1 **Debugging and consolidating multiple synthetic chromosomes reveals**  
2 **combinatorial genetic interactions**

3 Yu Zhao<sup>1</sup>, Camila Coelho<sup>1,†</sup>, Amanda L. Hughes<sup>2†</sup>, Luciana Lazar-Stefanita<sup>1,†</sup>, Sandy Yang<sup>1,†</sup>,  
4 Aaron N. Brooks<sup>2</sup>, Roy S. K. Walker<sup>3</sup>, Weimin Zhang<sup>1</sup>, Stephanie Lauer<sup>1</sup>, Cindy Hernandez<sup>1</sup>,  
5 Leslie A. Mitchell<sup>1</sup>, Neta Agmon<sup>1</sup>, Yue Shen<sup>4,5,6</sup>, Joseph Sall<sup>7</sup>, Viola Fanfani<sup>4</sup>, Anavi Jalan<sup>8</sup>,  
6 Jordan Rivera<sup>8</sup>, Feng-Xia Liang<sup>7</sup>, Giovanni Stracquadanio<sup>4</sup>, Lars M. Steinmetz<sup>2,9</sup>, Yizhi Patrick  
7 Cai<sup>4</sup>, and Jef D. Boeke<sup>1,10\*</sup>

8  
9

10 <sup>1</sup> Institute for Systems Genetics and Department of Biochemistry and Molecular Pharmacology,  
11 NYU Langone Health, New York, NY 10016, USA

12 <sup>2</sup> European Molecular Biology Laboratory (EMBL), Genome Biology Unit, 69117 Heidelberg,  
13 Germany

14 <sup>3</sup> School of Engineering, Institute for Bioengineering, The University of Edinburgh, Edinburgh  
15 EH9 3BF

16 <sup>4</sup> School of Biological Sciences, The University of Edinburgh, Edinburgh, EH9 3BF, UK

17 <sup>5</sup> BGI-Shenzhen, Beishan Industrial Zone, Shenzhen 518083, China

18 <sup>6</sup> Guangdong Provincial Key Laboratory of Genome Read and Write, BGI-Shenzhen, Shenzhen,  
19 518120, China

20 <sup>7</sup> Microscopy Laboratory, NYU Langone Health, New York, NY, 10016 USA

21 <sup>8</sup> Department of Biology, NYU, New York, NY, USA

22 <sup>9</sup> Department of Genetics and Stanford Genome Technology Center, Stanford University, Palo  
23 Alto, CA 94304, USA

24 <sup>10</sup> Department of Biomedical Engineering, NYU Tandon School of Engineering, Brooklyn, NY,  
25 USA

26 <sup>†</sup>Equal contributions

27 \*Correspondence: Jef D. Boeke  
28 Institute for Systems Genetics and Department of Biochemistry and Molecular Pharmacology,  
29 NYU Langone Health  
30 435 East 30th Street, Room 917  
31 New York, NY 10016  
32 Tel: 646-501-0503, E-mail: [jef.boeke@nyulangone.org](mailto:jef.boeke@nyulangone.org)  
33 Present addresses: NA and LAM, Neochromosome, Inc., Long Island City, NY, USA; YPC,  
34 University of Manchester, Manchester, UK; VF, Department of Biostatistics, Harvard T.H. Chan  
35 School of Public Health, Boston, MA, USA; RW, ARC Centre of Excellence in Synthetic  
36 Biology, School of Natural Sciences, Faculty of Science and Engineering, Macquarie University,  
37 Sydney, New South Wales, Australia; ANB, Inscripta, Inc. Boulder CO 80301, USA.

## 38 **Abstract**

39           The Sc2.0 project is building a eukaryotic synthetic genome from scratch, incorporating  
40 thousands of designer features. A major milestone has been achieved with the assembly of all  
41 individual Sc2.0 chromosomes. Here, we describe the consolidation of multiple synthetic  
42 chromosomes using endoreduplication intercross to generate a strain with 6.5 synthetic  
43 chromosomes. Genome-wide chromosome conformation capture and long-read direct RNA  
44 sequencing were performed on this strain to evaluate the effects of designer modifications, such  
45 as loxPsym site insertion, tRNA relocation, and intron deletion, on 3D chromosome organization  
46 and transcript isoform profiles. To precisely map “bugs”, we developed a method, CRISPR  
47 Directed Biallelic *URA3*-assisted Genome Scan, or “CRISPR D-BUGS”, exploiting directed  
48 mitotic recombination in heterozygous diploids. Using this method, we first fine-mapped a *synII*  
49 defect resulting from two loxPsym sites in the 3’ UTR of *SHM1*. This approach was also used to  
50 map a combinatorial bug associated with *synIII* and *synX*, revealing a highly unexpected genetic  
51 interaction that links transcriptional regulation, inositol metabolism and tRNA<sub>Ser</sub><sup>CGA</sup> abundance.  
52 “Starvation” for tRNA<sub>Ser</sub><sup>CGA</sup> leads to insufficient levels of the key positive inositol biosynthesis  
53 regulator, *Swi3*, which contains tandem UCG codons. Finally, to expedite consolidation, we  
54 employed a new method, chromosome swapping, to incorporate the largest chromosome (*synIV*),  
55 thereby consolidating more than half of the Sc2.0 genome in a single strain.

## 56 **Introduction**

57           Rapid advances in DNA synthesis technology enable the possibility of transitioning from  
58 genome reading and editing to genome writing. We are designing and synthesizing a eukaryotic  
59 genome *in silico* through a bottom-up approach (Richardson et al., 2017). This Sc2.0 genome is  
60 based on that of *Saccharomyces cerevisiae*, a unicellular eukaryotic model organism widely used  
61 in basic research and industrial fermentation. Previously, 6.5 out of 16 chromosomes had been  
62 successfully synthesized (Annaluru et al., 2014; Dymond et al., 2011; Mitchell et al., 2017; Shen  
63 et al., 2017; Wu et al., 2017; Xie et al., 2017; Zhang et al., 2017). Since then, the assembly of all  
64 the synthetic chromosomes has been completed. Each synthetic chromosome was synthesized  
65 separately by teams comprising the international Sc2.0 consortium. Consequently, each yeast  
66 strain produced contains only one synthetic chromosome, with the remainder of the genome still  
67 native. A challenge is to consolidate every chromosome into one fully synthetic Sc2.0 strain. In  
68 this study, we used an “endoreduplication intercross” strategy to consolidate all previously  
69 constructed 6.5 synthetic chromosomes (*synII*, *synIII*, *synV*, *synVI*, *synIXR*, *synX* and *synXII*) into  
70 a single strain.

71           The design of Sc2.0 will boast thousands of genome-wide edits as designer features. One  
72 of these is the relocation of all tRNAs to a neochromosome, requiring the removal of all  
73 endogenous tRNAs. Native *S. cerevisiae* contains 275 genomic tRNAs. In the *syn6.5* strains, 97  
74 of these were deleted, accounting for one-third of tRNA pools. To avoid possible growth defects  
75 due to reduced abundance of tRNAs during consolidation, we integrated a tRNA array into each  
76 synthetic chromosome, consisting of the synthetic counterparts of all the tRNAs deleted from  
77 their original locus on that chromosome. Meanwhile, other extensive modifications to the  
78 genome can also result in unexpected bugs in the form of unwanted fitness defects. Precisely and  
79 systematically mapping these variants has been a challenging and laborious task. Inspired by  
80 diverse CRISPR applications in yeast genomic editing, regulation and mapping (DiCarlo et al.,  
81 2013; Jacobs et al., 2014; Sadhu et al., 2016; Zetsche et al., 2015; Zhao and Boeke, 2018; Zhao

82 and Boeke, 2020), we developed a highly reliable bug mapping method known as CRISPR  
83 Directed Biallelic *URA3*-assisted Genome Scan (CRISPR D-BUGS). We successfully repaired  
84 bugs identified in single synthetic chromosomes, including a mitochondria-related defect caused  
85 by two loxPsym sites in the 3' UTR of *SHM1*. CRISPR D-BUGS was also expanded to map a  
86 combinatorial defect associated with an essential tRNA gene *SUP61* in *synIII* and *SWI3* in *synX*,  
87 encoding a subunit of the SWI/SNF chromatin remodeling complex. In this case, neither variant  
88 alone caused a fitness defect, but the combination of the two caused a severe defect.

89 In strains with multiple synthetic chromosomes, all mobile elements were deleted, tRNAs  
90 were relocated, and loxPsym sites were inserted into the 3' UTRs of many genes by design. To  
91 probe the effects of these changes on the 3D genome organization and transcriptional regulation  
92 of the compact yeast genome, we used chromosome conformation capture (Hi-C) and Nanopore  
93 direct RNA sequencing (Garalde et al., 2018) to characterize a strain with 6.5 synthetic  
94 chromosomes.

95 Finally, to expedite consolidation, we used a new method, chromosome swapping, to  
96 transfer the largest single synthetic chromosome, *synIV*, into the yeast strain that already carried  
97 6.5 synthetic chromosomes, thereby consolidating more than half of the genome of Sc2.0, and  
98 producing the *syn7.5* strain.

## 99 **Results**

### 100 **Synthetic chromosome consolidation using endoreduplication intercross.**

101 The Sc2.0 consortium assembled each of the 16 synthetic chromosomes (*synI-synXVI*) in  
102 discrete haploid strains. Two strains of opposite mating types and carrying different synthetic  
103 chromosomes can mate to generate a heterozygous diploid strain with multiple synthetic  
104 chromosomes. In order to avoid generating chimeric chromosomes due to efficient meiotic  
105 crossovers during sporulation, we previously established a consolidation strategy called  
106 “endoreduplication intercross”, which takes advantage of inducible chromosome destabilization

107 (Mitchell *et al.*, 2017; Reid *et al.*, 2008). Briefly, two strains with different synthetic  
108 chromosomes and opposite mating type are mated; the resulting heterozygous diploid strain  
109 carries two synthetic chromosomes along with their native counterparts, and the latter can be  
110 specifically destabilized using a pGAL promoter inserted adjacent to its centromere. After  
111 sporulating and screening the resulting spore clones, we obtain haploid strains with two or more  
112 synthetic chromosomes. This strategy was used to sequentially combine more than two  
113 individual synthetic chromosomes from their discrete parental strains. Following several rounds  
114 of intercross consolidation in which one new synthetic chromosome is consolidated per round,  
115 we obtained a single strain, YZY1178, with 6.5 synthetic chromosomes (*synII*, *synIII*, *synV*,  
116 *synVI*, *synIXR*, *synX* and *synXII*), representing all synthetic chromosomes assembled previously  
117 (Figure 1A and S1). In this strain, ~31% of the genome is synthetic, and thus it carries many  
118 designer features, including 91 removed introns, 97 relocated tRNAs, 444 TAG stop codons  
119 swapped to TAA, more than one thousand inserted loxPsym sites, and 4814 pairs of  
120 synonymously recoded synthetic PCRtags (Figure 1B).

121         One design feature of Sc2.0 is removal of all tRNA genes from their native loci, for  
122 eventual relocation to a specialized tRNA neochromosome (Richardson *et al.*, 2017). This  
123 feature creates a practical challenge for consolidating the chromosomes - before neochromosome  
124 assembly and delivery is complete, the available number of tRNA genes will decrease as more  
125 and more synthetic chromosomes are consolidated in a haploid strain. Notably, the tRNA genes  
126 lacking from the 6.5 synthetic chromosomes represent 97 of the 275 genomic tRNAs (Table S1).  
127 As an interim solution for possible fitness defects caused by this tRNA deficit, we designed a  
128 tRNA array, consisting of all tRNA genes from each individual chromosome, and then integrated  
129 each of these into its host synthetic chromosome (Figure 1C), thus maintaining the tRNA  
130 abundance and balance as additional synthetic chromosomes are incorporated. Briefly, each  
131 tRNA array was released from its host plasmid and integrated using homologous recombination  
132 (Figure S2). All tRNA genes were also flanked by rox sites, which can be recognized by Dre (but

133 not Cre) recombinase, enabling a chromosomal tRNA-specific rearrangement system (Figure S3-  
134 S4).

135 The “draft” syn6.5 strain grows slightly slower on rich medium (YPD) but grows  
136 comparably on plates with non-fermentable glycerol (YPG) (Figure 1D). Unlike the parent  
137 strains, the syn6.5 strain also shows an obvious growth defect at high temperature (37°C),  
138 suggesting the existence of a new “combinatorial bug” resulting from genetic interactions  
139 between designer variants introduced on more than one synthetic chromosome, analogous to the  
140 phenomenon of synthetic lethality/fitness. The karyotype of this strain was confirmed using  
141 pulsed field gel analysis (PFGE), with synthetic chromosomes showing expected faster migration  
142 due to their shorter lengths (Figure 1E). The uniform genome coverage of each chromosome in  
143 whole genome sequencing (WGS) (Figure S5). No new mutations or genome arrangements  
144 appeared during consolidation when compared to the original parental strains with single  
145 synthetic chromosomes.

146

#### 147 **Mapping fitness defects using CRISPR D-BUGS**

148 With thousands of designer modifications introduced, growth defects or “bugs” resulting  
149 from some of these designer changes have been observed in most synthetic chromosomes.  
150 Identifying these bugs is important for repairing cell fitness, and understanding their mechanisms  
151 may illuminate new biological insights. We developed a systematic and efficient bug-mapping  
152 strategy that exploits loss of heterozygosity (LOH) in diploids, called CRISPR Directed Biallelic  
153 *URA3*-assisted Genome Scan, or CRISPR D-BUGS. This approach makes use of heterozygous  
154 diploid strains bearing a synthetic chromosome and a native chromosome in which one of the  
155 telomeres bears a *URA3* marker gene. In such diploid strains, homologous recombination  
156 between two chromatids can be enhanced by a targeted chromosomal double-strand break  
157 (Figure 2A) (Sadhu *et al.*, 2016). After cell division, daughter cells will carry a pair of

158 chromosomes that are homozygous for synthetic DNA from the recombination site to the  
159 telomere region but retain heterozygosity in the remainder of the chromosome; these LOH events  
160 can be readily selected for by plating on 5-FOA. By using gRNAs that target different PCRTag  
161 sequences, a series of yeast strains with various homozygous synthetic regions can be generated  
162 (Figure 2B). We checked the fitness of the strains and subsequently mapped the “fitness  
163 boundary” at which derivative strains shift phenotypically from unhealthy to healthy.

164 Absent other mapping information, screening is begun within the resolution of a  
165 chromosome arm. Subsequently, the search continues with a series of gRNAs to map the bug  
166 more precisely. Resolution can be increased with two or more rounds of mapping until a group  
167 of colonies generated from the same single gRNA shows mixed fitness. This variability results  
168 from mitotic recombination occurring within a ~10kb window from the DNA cleavage site, such  
169 a region may include multiple designer features, such as PCRtag or loxPsym insertions (Sadhu *et*  
170 *al.*, 2016). Using WGS, the bug is mapped at high resolution by defining the locations of the  
171 synthetic genome modifications within the recombination interval. Following similar principles,  
172 CRISPR D-BUGS can also be used to map dominant bugs (Figure S6).

173 To test this approach, we first tried to map a perplexing bug on a previously synthesized  
174 chromosome. The original *synII* strain (chr02\_9\_03) showed a growth defect on YPG medium at  
175 37°C (Figure 3A). This recessive defect appeared after megachunk X was assembled (Shen *et al.*,  
176 2017). To map the *synII* bug using CRISPR D-BUGS, we constructed a *synII*/+ heterozygote,  
177 and then selected gRNAs targeting PCRtags within megachunk X. The colonies generated from  
178 gRNA.YBR256C and gRNA.YBR261C all showed the defect, whereas colonies generated from  
179 gRNA.YBR270C and gRNA.YBR275C were all healthy (Figure 3B and S7). This mapped the  
180 bug between *YBR261C* and *YBR270C*. In a second round of bug mapping, single colonies  
181 generated using gRNA.YBR265W showed a mixture of two fitness levels (Figure 3B and S8).  
182 Using WGS, we precisely located the recombination interval of each colony based on the  
183 synthetic sequence variants, and linked each variant to strain fitness (Figure 3C). This strategy



184 helped identify two adjacent loxPsym sites between *YBR263W* (*SHM1*) and *YBR264C* (*YPT10*)  
185 as responsible for the fitness defect. Deleting both loxPsym sites successfully restored strain  
186 fitness, as in strain YZY166 (chr02\_9\_04) (Figure 3A).

187 The loxPsym sites were integrated 3bp downstream of the stop codon of *SHM1* and  
188 *YPT10*, a pair of convergent and closely spaced genes (Figure S9A). *SHM1* encodes the  
189 mitochondrial serine hydroxymethyltransferase, and its deletion results in impaired respiratory  
190 function, consistent with the observed *synII* fitness defect on YPG (May et al., 2020). In contrast,  
191 *ypt10* deletion showed no difference compared to wild-type strains under various conditions  
192 including different temperatures or carbon sources (Louvet et al., 1999). These genes are  
193 convergent and closely spaced, such that integration of loxPsym sites 3 bp downstream of their  
194 stop codons produces *SHM1* transcripts containing two loxPsym sequences in their 3' UTRs.  
195 These two loxPsym sequences are predicted to form a stem-loop structure in the *SHM1* 3' UTR,  
196 which we hypothesize may affect mRNA stability (Figure S9B and C). Consistent with this  
197 hypothesis, deletion of both or either loxPsym site(s) significantly recovered transcript  
198 abundance and successfully rescued the growth defect, strongly implying that formation of a  
199 stem loop in the RNA leads to loss of RNA abundance and the fitness defect (Figure 3D and  
200 S10A). We also found that *Shm1p* level was reduced in the presence of two loxPsym sites, and  
201 recovered upon their removal (Figure S10B).

202 Since the two loxPsym sites are located in the 3' UTR, we also wondered about their  
203 effects on transcript properties. To answer this, we used Nanopore direct RNA sequencing to  
204 evaluate full-length native transcripts of *SHM1* and *YPT10* directly, and measured the transcript  
205 end site (TES) distributions (Brooks et al., 2022). In the original *synII* (chr02\_9\_03) strain, the  
206 majority of *SHM1* TESs were extended by ~66 nt, matching the length of the two transcribed  
207 loxPsym sites (68 nt), indicating that *SHM1* transcript termini were not significantly affected  
208 (Figure 3E). There were also around 10% transcripts extended by ~160 nt, forming a second  
209 peak specific to *synII*, suggesting that transcription termination could be slightly affected by the

210 loxPsym sequences. The removal of both loxPsym sites (chr02\_9\_04) successfully recovered the  
211 TES distribution, overlapping with the wild type peak. For the *SHM1* TES in YZY363 and  
212 YZY374, in which the individual loxPsym sites were deleted, a single peak was formed and  
213 extended by ~32 nt, matching the expected length of a single loxPsym site. We also measured  
214 the *YPT10* TESs in these strains and observed similar patterns (Figure S11). In summary, the  
215 incorporation of two loxPsym sites, presumably forming a stem loop in their 3' UTRs, mainly  
216 affected the quantity but not the isoform boundaries of *SHM1* and *YPT10* transcripts.

217

### 218 **Mapping a *synI* bug to an unexpected deletion.**

219 CRISPR D-BUGS was also applied to map the growth defect of a *synI* strain. A special  
220 feature of *synI* is that it is fused with *synIII* (Luo et al., 2022). The draft strain (yJL671,  
221 chr01\_9\_02) showed a recessive growth defect even on rich medium (YPD), which is not caused  
222 by chromosome fusion (Figure S12). Using CRISPR D-BUGS, we successfully mapped the bug  
223 to a window of 5 open reading frames (ORFs) between *YAL055W* and *YAL049C* in a single  
224 round of mapping (Figure S13). Using WGS, we found an unexpected ~10kb deletion in yJL671,  
225 which became homozygously deleted in the low-fitness diploids, but remained heterozygous in  
226 the healthy strains (Figure 3G and S14). By checking *synI*'s assembly history, we found that this  
227 deletion was caused by an unexpected off-target recombination between two loxPsym sites  
228 during CRISPR-mediated repair of a missense mutation in strain yJL663, which contained an  
229 earlier draft *synI* version (Figure 3H and S15A). By repairing this deletion using SpCas9-NG, a  
230 final healthy strain with the complete *synI* sequence was obtained as yCTC002 (Figure 3I and  
231 S15B) (Nishimasu et al., 2018). In summary, CRISPR D-BUGS was used to quickly map distinct  
232 bug types in *synI* and *synII*.

233

### 234 **A combinatorial bug associated with *synIII* and *synX***

235           Although strains with single synthetic chromosomes are healthy, combinatorial defects  
236 can still occur due to combinations of sequence changes that by themselves have no phenotypes,  
237 owing to genetic interactions between variants on two (or theoretically more than two) synthetic  
238 chromosomes. While strains containing *synIII* (chr03\_9\_02) and *synX* (chr10\_9\_01) alone are  
239 healthy, we found a combinatorial defect at high temperature in a strain containing both *synIII*  
240 and *synX* and no other synthetic chromosomes (Figure 4A). We first used CRISPR D-BUGS to  
241 map the bug in *synX* (Figure S16). In the first round of “rough” mapping, we successfully  
242 mapped a fitness boundary between *YJL097W* and *YJL210W* at the left arm (Figure S17). By fine  
243 mapping within this interval, we found that single colonies generated from a gRNA targeting  
244 *YJL176C* showed mixed fitness levels (Figure. S18). Using WGS, we mapped the bug to the  
245 loxPsym site integrated downstream of the *YJL175W* ORF, representing the boundary separating  
246 healthy and temperature-sensitive strains (Figure 4B).

247           *YJL175W* is a “dubious ORF”, and overlaps the 5’ end of *YJL176C* (*SWI3*), an important  
248 named gene. The loxPsym inserted into the 3’ UTR of *YJL175W* is transcribed as a part of the  
249 *SWI3* 5’ UTR (Figure 4C). Consequently, there are two loxPsym sequences in the transcript of  
250 *SWI3*, which might therefore form a looped secondary RNA structure. Interestingly, the *synX*  
251 *SWI3* transcript level was increased by three-fold, and this transcriptional phenotype was  
252 restored to the wild-type level by deleting the 5’ UTR loxPsym, but not by deleting the 3’ UTR  
253 loxPsym (Figure 4D). Paradoxically, the Swi3p level was reduced in the presence of 5’ UTR  
254 loxPsym and restored upon its removal (Figure 4E). The most parsimonious explanation for  
255 these results is that the inverted repeat within the loxPsym sequence in the 5’ UTR forms a stem  
256 loop that stabilizes the RNA isoform and blocks translation. Insertion of the loxPsym in the 3’  
257 UTR, as in all other nonessential Sc2.0 genes, had minimal to no effect on protein levels. The  
258 temperature sensitive phenotype unique to the *synIII*, *synX* strain (but not the two parental  
259 strains) is consistent with the fact that a *swi3* null allele results in temperature sensitivity  
260 (Auesukaree et al., 2009). As an essential component of the SWI/SNF chromatin remodeling

261 complex, Swi3p is required for the transcription of many genes, including *INO1*, and *swi3* null  
262 mutants are viable but auxotrophic for inositol (Peterson and Herskowitz, 1992; Villa-García et  
263 al., 2011; Yoshinaga et al., 1992). Remarkably, the *synX* strain displayed partial inositol  
264 auxotrophy, which was largely restored by removing the 5' UTR loxPsym site (but not the 3'  
265 UTR loxPsym site; Figure S19), consistent with the proposed mechanism. A similar pattern was  
266 observed in a *synVII* bug (Figure 4C), wherein a similarly “misplaced” loxPsym site in the *NSRI*  
267 5' UTR led to increased mRNA, but dramatically reduced protein level (Shen et al., 2022). As in  
268 the case above, deletion of the 5' loxPsym site restored normal transcript and protein levels, and  
269 rescued the growth defect in *synVII* strains.

270         Following the same principles, we mapped the bug in *synIII* (chr03\_9\_02) with CRISPR  
271 D-BUGS initially to the right arm, then roughly to between *YCR057C* and *YCR067C* (Figure  
272 S20) and finally fine-mapped the bug to two loxPsym sites between *YCR061W* and *YCR065W*  
273 (Figure 4F). By restoring them to wild-type, we found that the left side loxPsym site between  
274 *YCR061W* and *YCR064C* seemingly caused the defect (Figure S21). This loxPsym site marked  
275 the deletion of *SUP61*, an essential single copy tRNA<sub>Ser</sub><sup>CGA</sup> gene, which decodes the rare UCG  
276 serine codon (Figure 4G). Importantly, unlike the examples mentioned above, this loxPsym site  
277 was not embedded inside any transcribed region, suggesting that it might be deletion of the  
278 tRNA itself that was responsible for the defect. As a part of the overarching Sc2.0 design, all  
279 tRNA genes are to be relocated to a new synthetic neochromosome encoding only tRNAs  
280 (Richardson *et al.*, 2017). Before introduction of the complete tRNA neochromosome, all strains  
281 containing *synIII* have a synthetic version of *SUP61* (*synSUP61*) integrated in the *HO* locus on  
282 *chrIV* to temporarily provide its essential function. By itself, *synSUP61* suffices for cell survival  
283 and health (Annaluru et al., 2014). Like all of the synthetic tRNAs in Sc2.0, *synSUP61* is flanked  
284 by 500bp 5' and 40bp 3' of *Ashbya gossypii* tRNA flanking sequences and has a precise intron  
285 deletion. Introducing a single copy of *SUP61* in the strain complemented the defect (Figure S21),  
286 suggesting that *synSUP61* is too lowly expressed or otherwise incapable of providing full

287 functionality. To test this hypothesis, we examined expression of *synSUP61* by Northern blotting  
288 and observed that it produces only about half the normal amount of mature tRNA, and a  
289 surprisingly large amount of 5' pre-tRNA, suggesting inefficient processing of this tRNA,  
290 relative to *SUP61* (Figure 4H). This appears to be associated with replacing the tRNA 5' flanking  
291 region with the sequence from *Ashbya* in *synSUP61*, and not the intron deletion or the 3'  
292 flanking region swap (Figure S22).

293 As both parental *synIII* and *synX* strains are healthy, we conclude that the combinatorial  
294 bug results from an unexpected interaction between *synSUP61* and *SWI3*, both of which appear  
295 to be under-expressed relative to their native counterparts. The single copy essential *SUP61* gene  
296 produces the only tRNA decoding the rare UCG serine codon. Interestingly, the *SWI3* transcript,  
297 has above average usage of UCG for serine, and importantly, it includes two tandem UCG  
298 codons (Figure S23). Tandem rare codons can cause translational pausing or even arrest due to  
299 “starvation” for charged cognate tRNAs (Guimaraes et al., 2020; Kane, 1995; Wang et al., 2016).  
300 Based on this, we hypothesized that reduced abundance of tRNA<sub>Ser</sub><sup>CGA</sup> further reduces  
301 expression of *SWI3* below the already lower than normal level, caused by the ectopic loxPsym  
302 site in the 5' UTR. This is predicted to result in an even lower level of functional SWI/SNF  
303 complex and the resulting pronounced growth defect (Figure 4I). To test this hypothesis, we  
304 repaired either or both bugs, and measured inositol auxotrophy (Figure 4J). Interestingly, either  
305 deletion of the *SWI3* loxPsym site or addition of *SUP61* individually were able to partially rescue  
306 auxotrophy, suggesting that ultimately, the observed phenotypes are the consequence of low  
307 *Swi3* protein. When the two “buggy” components were both restored to their native forms, the  
308 fitness of the strain was successfully rescued. To confirm this combinatorial interaction  
309 mechanism, we mutated either of the *SWI3* tandem serine codons from rare UCG to common  
310 UCU, with *SWI3* loxPsym site deleted (Figure S24). Consistently, strains with either mutation  
311 showed significantly improved growth on plates without inositol. Notably, the inositol auxotroph  
312 was still not completely rescued. Similar results were also observed in *synX* strain, in which

313 removal of the 5' *SWI3* loxP site significantly, but not completely rescued inositol auxotrophy,  
314 suggesting that other synthetic modifications may exist affecting inositol biosynthesis.

315 By repairing the *SWI3* and *synSUP61* bugs, the fitness of the *synIII*, *synX* strain was  
316 largely rescued at both 30°C and high temperature (Figure 4K). For multiple synthetic  
317 chromosomes (*synII*, *synIII*, *synV*, *synVI*, *synIXR*, *synX*, *synXII*), we repaired all known bugs,  
318 including the *SHM1* bug in *synII* and the combinatorial bug between *SWI3* in *synX* and  
319 *synSUP61* in *synIII*. As expected, the growth defect was dramatically improved, albeit with  
320 minor residual growth defects at high temperatures (Figure S25).

321

### 322 **Characterization of multiple synthetic chromosomes in syn6.5 strains**

323 Even after repairing bugs in the synthetic chromosomes that affect growth phenotypes,  
324 we remained curious about how multiple synthetic chromosomes would affect genome  
325 organization and whether the large numbers of designer features would affect transcription.  
326 Therefore, we used genomic chromosome conformation capture (Hi-C) to investigate the  
327 organization of all 6.5 synthetic chromosomes in the nucleus. The Sc2.0 design improved  
328 mappability as a result of the deletion of repetitive regions, especially the Ty elements (Mercy et  
329 al., 2017). In our strain with 6.5 synthetic chromosomes, we calculated the spatial contact  
330 frequency and generated a heat map of genomic interactions (Figure 5A). Based on that, we  
331 generated a 3D map showing the trajectories of the synthetic and native yeast chromosomes  
332 (Figure 5B and S27). Similar to the wild type, all centromeres of synthetic and native  
333 chromosomes interacted *in trans* near the spindle pole body (SPB), as well as their telomeres  
334 clustered at the nuclear envelope (Taddei and Gasser, 2012). To detect differences in the internal  
335 folding of the chromatin, we calculated the decay of contact frequency as a function of the  
336 genomic distance genome-wide, and no substantial differences were observed (Figure 5C). These  
337 results indicated that Sc2.0 designer modifications have minor effects on the chromosomal  
338 organization, even when multiple synthetic chromosomes are combined.

339 Unexpectedly, for each synthetic chromosome, we noted a surprisingly sharp boundary  
340 formed at one position in their contact frequency maps (Figure 5D). These supersharp boundaries  
341 exactly match all locations of the tRNA arrays, such as the *synII* tRNA array integrated at the left  
342 arm close to *CEN2* (~11 kb) and the *synIII* tRNA array integrated on the right arm close to *CEN3*  
343 (~9.2 kb). The same results were observed in other synthetic chromosomes with tRNA arrays  
344 integrated, but not in the native chromosomes that lack these (Figure S26). This result suggests  
345 that very active tRNA transcription manifests as a higher frequency of intra-locus contacts for  
346 tRNA arrays and results in a mild structural alteration of the pericentromeric chromatin.

347

### 348 **Transcript profiling using RNAseq**

349 To determine whether transcript boundaries were affected by the incorporation of  
350 synthetic design features, we mapped transcript isoforms from the *syn6.5* strain using Nanopore  
351 long-read direct RNA sequencing. As expected, transcript start sites were not affected by  
352 inclusion of 3' loxPsym sites. Neither transcripts arising from genes on the native chromosomes  
353 nor those without flanking loxPsym sites on the synthetic chromosomes showed end site  
354 alterations; however, the addition of loxPsym sites at the 3' end of genes increased the length of  
355 their transcripts by 34 nt on average (Figure 5E). This is consistent with incorporation of the  
356 loxPsym site into the transcript without altering its cleavage/polyadenylation site.

357 To assess the effects of synthetic genome design on gene expression levels, we performed  
358 stranded mRNA sequencing. Some genes on the native and synthetic chromosomes, both with  
359 and without flanking loxPsym sites, showed significantly altered expression levels (Figure 5F),  
360 indicating that the synthetic genome design caused some, but not widespread, indirect effects on  
361 gene expression levels. LoxPsym-flanked genes were not significantly affected compared with  
362 genes on the native chromosomes; however, genes with transcripts that incorporate two loxPsym  
363 sites within their 3' UTRs tended to experience a slight decrease in transcript abundance (Figure  
364 5G), potentially indicating decreased stability of these transcripts on average. This was consistent

365 with the *synII* growth defect caused by two tandem loxPsym sites in the *SHM1* 3' UTR. The  
366 relocation of tRNAs led to a major alteration in the 3D organization of the synthetic  
367 chromosomes (Figure 5D). We therefore compared expression of genes adjacent to tRNAs in the  
368 native and synthetic chromosomes and saw that the removal of tRNA genes in the synthetic  
369 genome appeared to be associated with increased expression of their former neighbors (Figure  
370 5H), consistent with previous studies of tRNA gene mediated silencing (Good et al., 2013;  
371 Hamdani et al., 2019; Hull et al., 1994). This observation did not hold true for slightly more  
372 distant genes (<1kb), suggesting that tRNA expression only affects the most proximal genes. The  
373 removal of introns from genes in the synthetic genome also did not appear to greatly affect their  
374 expression levels (Figure S28). Overall, the design features of the *syn6.5* genome appear to have  
375 only modest effects on transcript isoform boundaries and expression levels, making this strain a  
376 useful background to examine the effects of future SCRaMbLE perturbations.

377

### 378 **Morphology of yeast cells with *syn6.5***

379 To evaluate the cell morphology of yeast strains with multiple synthetic chromosomes,  
380 we visualized dividing *syn6.5* cells with scanning electron microscopy (Figure 5I and J). They  
381 showed active multiplication and normal cell morphology, length and shape. The budding of  
382 daughter cells left ring-shaped bud scars on the cell wall of mother cells. We observed several  
383 cells at various stage of budding, including an aged mother cell with seven bud scars that was  
384 still actively budding. Rewriting multiple chromosomes as synthetic does not appear to affect  
385 cell morphology or cellular lifetime.

386

### 387 **Transferring *synIV* into synthetic chromosome strains using chromosome swapping**

388 Currently, all yeast chromosomes have been synthesized separately in their individual  
389 host strains. In order to consolidate them more efficiently in the current *syn6.5* strain, we  
390 deployed a new consolidation strategy: chromosome swapping (McCulloch et al., 2022). We



391 hoped to develop a method to directly transfer individual new chromosomes to a recipient  
392 haploid strain that already carries multiple synthetic chromosomes. In yeast, *kar1-1* or *kar1-Δ15*  
393 mutations prevent nuclear fusion during mating when it is present in either parent (Conde and  
394 Fink, 1976). Thus, most progeny of these crosses remain haploid, but have a mixed cytoplasm. In  
395 these cells, chromosomes are occasionally transferred from the donor to the recipient strain. This  
396 process, called “exceptional cytoduction” (Dutcher, 1981) or chromoduction (Ji et al., 1993),  
397 results in an n+1 cell which can be selected for using proper auxotrophic and drug resistance  
398 markers.

399         Based on this phenomenon, a chromosome swapping method was developed entailing  
400 two steps: 1) introduction of the chromosome of interest into a recipient strain by  
401 chromoduction, resulting in an n+1 strain, and 2) destabilization of the native chromosome by  
402 inducing transcription through its centromere in the n+1 strain (McCulloch et al., 2022). To  
403 demonstrate how chromosome swapping could be deployed in synthetic chromosome  
404 consolidation, we picked the largest synthetic chromosome, *synIV*, as a “worst case scenario”  
405 proof of principle (Figure 6). The efficiency of chromoduction is inversely correlated with the  
406 chromosome size, and using this approach, each subsequent smaller synthetic chromosome swap  
407 is predicted to be even more efficient (Dutcher, 1981).

408         First, in the recipient strain (*syn6.5* as described above), we sequentially introduced 1) a  
409 *can1Δ0* deletion, 2) a *cyh2* mutation and 3) a *lys4Δ0* deletion in *chrIV* using CRISPR/Cas9,  
410 making the strain resistant to canavanine and cycloheximide and auxotrophic for lysine,  
411 respectively (Strain ZZY402). The *can1Δ0* and *cyh2* markers are used to select against non-  
412 mating donor strains and occasionally formed diploid zygotes. The *lys4Δ0* can be complemented  
413 by *LYS4<sup>+</sup>* in *synIV* from the donor strain. Next, the *kar1-1* mutation was introduced using  
414 CRISPR/Cas12a. After mating and selection for chromoductants, haploid progeny with both  
415 native and synthetic chromosome *IV* were successfully obtained. Finally, native *chrIV* was  
416 destabilized upon induction of the pGAL promoter and selection for 5-FOA<sup>R</sup>.

417 This transfer produced a yeast strain with more than half of its genome synthetic (Figure  
418 6). This new strain (*synII*, *synIII*, *synIV*, *synV*, *synVI*, *synIXR*, *synX*, *synXII*) was confirmed as a  
419 haploid synthetic strain by WGS and flow cytometry (Figure S29). It was characterized by  
420 slower growth, with a G1 arrest, suggesting a cell cycle defect, and will require further bug  
421 mapping to generate a high fitness derivative. Combined with CRISPR D-BUGS, chromosome  
422 swapping is a NextGen strategy to consolidate and debug new, incoming synthetic chromosomes  
423 into the genetic background of other synthetic ones.

424

## 425 **Discussions**

426 The goal of Sc2.0 project is to build the first eukaryotic organism with a completely  
427 redesigned and human-synthesized genome. One yeast strain carrying 6.5 synthetic  
428 chromosomes was successfully constructed from several rounds of endoreduplication intercross,  
429 followed by extensive debugging. We also successfully used chromosome swapping to  
430 incorporate *synIV* creating the *syn7.5* multiple synthetic strain. Continued use of these methods  
431 will facilitate consolidation of all remaining synthetic chromosomes to construct a final, fully  
432 synthetic Sc2.0 strain.

433 In Sc2.0, thousands of genome-wide edits were introduced as designer features, including  
434 removal of introns and mobile elements, stop codon swaps intended to remove all instances of  
435 the TAG stop codon, addition of loxP sites, and relocation of all tRNA genes from their  
436 native loci onto a neochromosome. These features facilitate a variety of applications such as  
437 genome minimization, novel amino acid incorporation and SCRaMbLE. As an inducible  
438 evolution system, SCRaMbLE has been used to exploit genomic structural variation,  
439 biosynthesis pathway engineering and host strain improvement (Blount et al., 2018; Luo et al.,  
440 2018b; Shen et al., 2018; Shen et al., 2016; Zhao et al., 2020). Most recently, combined with  
441 deep transcript isoform profiling, synthetic chromosomes and SCRaMbLE have been used to

442 study genome architecture and its contribution to transcriptional regulation (Brooks *et al.*, 2022).  
443 Genome-wide SCRaMbLE and rearrangements also provide insights into 3D spatial organization  
444 and chromatin-accessibility (Zhou *et al.*, 2022). With more synthetic chromosomes incorporated,  
445 SCRaMbLE can also be deployed to study additional biological questions such as new yeast  
446 phenotypes and minimized chromosomes and genomes, making Sc2.0 a novel platform to  
447 understand eukaryotic genomes and develop industrial applications.

448 Native *S. cerevisiae* contains 295 introns that belong to 280 genes, and 91 of these introns  
449 were deleted in the syn6.5 strains. Previous studies have demonstrated that intron accumulation  
450 might aid yeast starvation response by sequestering available splicing factors and affecting  
451 splicing of RNAs encoded by other genes, especially ribosomal-protein genes, which are  
452 hypothesized to be regulated by rapid intron removal once fresh nutrients are supplied (Morgan  
453 *et al.*, 2019; Parenteau *et al.*, 2019). As the splicing machinery is presumably more readily  
454 available in the syn6.5 strain, it would be interesting to evaluate the impact its reduced intron  
455 content may have on splice isoforms and spliced/unspliced ratios of the genes residing on the  
456 residual native chromosomes in the future.

457 The introduction of these designer edits also results in unexpected bugs in the form of a  
458 wide variety of growth defects. We developed a new mapping strategy CRISPR D-BUGS to map  
459 these bugs, facilitating their elimination by reversion. Interestingly, several bugs found in this  
460 and companion studies map to loxPsym sites introduced downstream of what are now classified  
461 as “dubious ORFs” which end up damaging promoters and 5’ UTRs of authentic genes. Thus,  
462 this is a type of bug that results from the rules of Open Reading Frame annotations which were  
463 adopted early in the Sc2.0 project, when dubious ORFs were not yet well defined and annotated.

464 This debugging method will also be helpful during further consolidation of additional  
465 synthetic chromosomes. Using CRISPR-D-BUGs, we first mapped a *synII* growth defect to two  
466 repetitive loxPsym sites in the *SHM1* 3’ UTR, which led to reduced expression by an unknown  
467 mechanism. *SHM1* encodes mitochondrial serine hydroxymethyltransferase (SHMT), an enzyme

468 that can interconvert serine and glycine and produce 5,10 methylene tetrahydrofolates (CH<sub>2</sub>-  
469 THF). Shm1p only comprises about 5% of total SHMT activity whereas its cytosolic isoform  
470 Shm2p comprises the majority (Kastanos et al., 1997). Shm1p and Shm2p are conserved from  
471 bacteria to humans, and both enzymes are essential components in the one-carbon metabolism  
472 cycle, which provides a crucial substrate for mitochondria initiator tRNA formylation and other  
473 reactions required for biosynthesis of nucleotides, amino acids and lipids (Lee et al., 2013; Piper  
474 et al., 2000). The *shm1Δ* strain was shown to have a near-WT level of formylation and  
475 mitochondrial protein expression, suggesting that cytosolic SHMT activity produces a sufficient  
476 supply of one carbon units in the absence of Shm1p (May *et al.*, 2020).

477         A further clue about this bug came from the observation that an extra copy of *TSC10*  
478 suppressed the *synII* growth phenotype. We found that overexpressing *TSC10* either from a  
479 plasmid or via ectopic integration at the *HO* locus rescued the growth defect of *synII* (Figure  
480 S30). *TSC10* is an essential gene, encoding a 3-ketosphinganine reductase catalyzing the second  
481 step in phytosphingosine synthesis, using serine as the key precursor molecule (Beeler et al.,  
482 1998). This pathway is the basis for all sphingolipids made in yeast, including ceramide, a major  
483 component of the mitochondrial membrane. Interestingly, this pathway is highly involved in heat  
484 stress response and activated immediately upon onset of heat stress (Chen et al., 2015). Several  
485 sphingolipids were also implicated as secondary messengers involved in signaling pathways that  
486 regulate the heat stress response (Jenkins et al., 1997). Based on this, we speculate that in the  
487 original *synII* strain (chr02\_9\_03), sphingolipid/ceramide biosynthesis was also affected when  
488 grown on YPG medium due to a deficit of cytosolic serine. This is supported by the fact that  
489 serine is mainly synthesized from glycine via SHMT activity of Shm1p and Shm2p in a  
490 “gluconeogenic” pathway on non-fermentable glycerol but not on glucose (Albers et al., 2003;  
491 Melcher and Entian, 1992). In short, we hypothesize that *SHM1* under-expression leads to  
492 insufficient ceramide biosynthesis and at high temperature this reduces mitochondrial function.

493           During consolidation, we noted the existence of a combinatorial bug revealed when  
494 combining *synIII* and *synX*, which was later mapped and resolved using CRISPR D-BUGS.  
495 Individual *synIII* or *synX* strains are highly fit. Using a *synIII*, *synX* strain, we successfully  
496 mapped the combinatorial bug to *synSUP61*, which under-expresses tRNA<sub>Ser</sub><sup>CGA</sup> and *SWI3*,  
497 which is under-expressed due to a loxPsym site in its 5' UTR, respectively. Reduction of *SWI3*  
498 expression and consequently, inositol auxotrophy phenotypes were further enhanced by reduced  
499 tRNA<sub>Ser</sub><sup>CGA</sup> abundance. In support of this model, mutation of tandem codons recognized by  
500 tRNA<sub>Ser</sub><sup>CGA</sup> in *SWI3* dramatically suppressed the phenotype. tRNA abundance and codon usage  
501 are closely linked, with “rich” codons corresponding to abundant tRNAs overrepresented in  
502 highly expressed genes (Frumkin et al., 2018; Wei et al., 2019). Optimal codon usage is also  
503 predicted to ensure the proper speed of translation elongation for efficiency, accuracy and correct  
504 protein folding (Guimaraes *et al.*, 2020; Liu, 2020). Under stressful conditions, yeast can alter  
505 tRNA abundance to facilitate selective stress-related translation and interestingly, rare codons  
506 corresponding to low-abundance tRNAs are enriched in stress-responsive genes potentially  
507 allowing for efficient and sensitive regulation (Torrent et al., 2018). From a synthetic  
508 chromosome consolidation perspective, we discovered a completely unexpected connection  
509 between abundance of a single copy tRNA, inositol auxotroph and potentially, chromatin  
510 dynamics, consistent with regulation via codon usage and tRNA pool adjustments. In the current  
511 stage of Sc2.0, the tRNAs have been relocated into chromosome-specific tRNA arrays but will  
512 eventually be consolidated into a single neochromosome. Each tRNA gene in the arrays is  
513 flanked by rox recombination sites that can be recognized by Dre recombinase. This site-specific  
514 recombinase system can be deployed to perform a tRNA gene-specific form of SCRaMbLE, but  
515 it can also be deployed in the future to simultaneously remove all of the chromosome specific  
516 tRNA arrays once a future version of the tRNA neochromosome, namely one entirely lacking  
517 rox sites, is introduced into the Sc2.0 progenitor strain.

518 Finally, we have constructed 21 strains with all pairwise combinations of 7 previously  
519 completed synthetic chromosomes (Figure S31). Happily, the vast majority of these show no  
520 growth defect at 30°C. However, we noted modest growth defects at 37° suggesting that  
521 additional but mild combinatorial bugs may exist in the strains containing *synII/synXII* and  
522 *synII/synVI*. Consequently, the current syn6.5 strain containing these synthetic chromosomes still  
523 shows a growth defect at high temperature, although the fitness has improved dramatically since  
524 fixing these known bugs. Debugging combinatorial defects is more challenging than single bugs,  
525 but we are confident that CRISPR D-BUGS will greatly facilitate deciphering these.

526

## 527 **Experimental Procedures:**

528

### 529 **Synthetic chromosome versions**

530 We started the consolidation using strains containing individual synthetic chromosome and when  
531 necessary, we switched the mating type using CRISPR (Xie et al., 2018). Detailed information  
532 on intermediate strain names, genotypes and version numbers are listed in Table S4. Briefly, they  
533 are *synII* yeast\_chr02\_9\_03 (Shen *et al.*, 2017), *synIII* yeast\_chr03\_9\_02 (Annaluru *et al.*, 2014),  
534 *synIV* yeast\_chr04\_9\_03 (Zhang *et al.*, 2022), *synV* yeast\_chr05\_9\_22 (Xie *et al.*, 2017), *synVI*  
535 yeast\_chr06\_9\_03 (Mitchell *et al.*, 2017), *synIXR* genebank JN020955 (Dymond *et al.*, 2011),  
536 *synX* yeast\_chr10\_9\_01 (Wu *et al.*, 2017) and *synXII* yeast\_chr12\_9\_02 (Zhang *et al.*, 2017).

537

### 538 **Yeast media, growth and transformation**

539 Yeast strains were cultured in YPD-rich medium or defined SC media with appropriate  
540 components dropped out. All yeast transformations were performed using standard lithium  
541 acetate protocols (Brachmann et al., 1998). To check *synII* growth defects, YPG plates contained  
542 3% glycerol. For inositol auxotrophy tests, the inositol free YNB medium was prepared using  
543 yeast nitrogen base w/o inositol (US Biological Y2030-01), and supplemented with 5 g/L

544 ammonium sulfate, 2% dextrose and the necessary amino acid supplements. Control plates were  
545 supplemented with 76 mg/L myo-inositol (Sigma I5125).

546

### 547 **Consolidation using endoreduplication intercross**

548 Two separate synthetic chromosomes were consolidated using endoreduplication intercross from  
549 their host strain with opposite mating types (Mitchell *et al.*, 2017). First, the two host haploid  
550 strains were engineered: the *KIURA3*-pGAL-CENx module was integrated into the native  
551 counterparts of the target synthetic chromosomes to be lost (Hill and Bloom, 1987). Our early  
552 experiments suggested that destabilizing two native chromosomes per diploid by this method  
553 worked more reliably than trying to destabilize larger numbers of native chromosomes at the  
554 same time. After mating and inoculation in YP+Galactose (2%) medium overnight, the relevant  
555 heterozygous diploid strain was screened on SC+5-FOA plates for successful destabilization of  
556 both target chromosomes, generating a  $2n-2$  strain. After growth for 24 hours allowing for  
557 endoreduplication in YPD, the strain was cultured in sporulation medium at room temperature.  
558 Finally, from tetrad dissection, spore clones with more than both target synthetic chromosomes  
559 were obtained. This process was continued to consolidate more synthetic chromosomes (Figure  
560 S1).

561

### 562 **tRNA array design and integration**

563 For each synthetic chromosome, a tRNA array containing all the synthetic version of tRNA  
564 genes from its host chromosome was constructed (Table S2). Each syn-tRNA contains 500bp 5'  
565 and 40bp 3' flanking sequences from *Eremothecium (Ashbya) gossypii* or *Eremothecium*  
566 *cymbalariae*. The tRNA arrays were integrated as described in Figure S2. The arrays were  
567 released from plasmids using restriction enzyme digestion (Table S3). To integrate tRNA arrays,  
568 we constructed junction DNAs with 500bp homology arms to the target genomic locus, 500bp  
569 homology arms to the linearized tRNA array and the *KIURA3* selection marker at one end.

570 Integrations were selected on SC–Ura plates and confirmed by colony PCR. Afterwards, the  
571 *KIURA3* marker was deleted using CRISPR/Cas9 and a gRNA.KIURA3  
572 (ACCAGTAACCCCGTGGGCGT), provided with a flanking donor DNA.

573

#### 574 **CRISPR D-BUGS.**

575 In this study, we developed CRISPR D-BUGS to quickly and reliably map the bug on a synthetic  
576 chromosome. Step one in this process is to determine whether the fitness defect is recessive  
577 (most cases) or dominant. Assuming that the defect to be mapped is recessive, we first created a  
578 diploid strain of yeast heterozygous for the target chromosome arm with a *URA3* marker  
579 integrated in an intergenic region close to the telomere (~25kb) of the native chromosome. Then  
580 several gRNAs targeting WT PCRtags at different regions along the chromosome were selected  
581 (Table S5). For the initial round of CRISPR D-BUGS, it is good to have gRNAs targeting near  
582 the telomeres, near the middle of the left or right arms, and on either side of the centromere (at  
583 least ~10kb away). The gRNA was assembled into a CRISPR/pGAL-Cas9 plasmid backbone  
584 (pYZ555 with *LEU2* marker) using Golden Gate cloning (Zhao and Boeke, 2020).

585 Afterwards, the heterozygous diploid strain was transformed with the CRISPR plasmid and  
586 selected on SC–Leu dextrose plates (Cas9 OFF). A single colony was inoculated in SC–Leu  
587 galactose medium and incubated at 30°C overnight (Cas9 ON). The medium was diluted and  
588 plated on 5-FOA plates to select the single colonies with successful mitotic recombination,  
589 further confirmed using PCRtag assays. Finally, we assessed fitness by single colony formation  
590 spot tests to identify the fitness boundary. Once the fitness boundary is rough-mapped, further  
591 intermediate gRNAs can be chosen for fine mapping until a gRNA that produces a mix of fit and  
592 unfit clones is identified. WGS of the fit and unfit clones can then be deployed to fine-map the  
593 fitness boundary.

594

#### 595 **Genomic editing using CRISPR/SpCas9-NG**



596 The CRISPR/SpCas9-NG system was used to repair an accidental single base pair mutation in  
597 *synI YAL061W*. The SpCas9-NG ORF was subcloned from pX330-SpCas9-NG obtained from  
598 Addgene (#117919), and assembled with *TEF1* promoter and *CYCI* terminator (Zhang et al.,  
599 2022). Briefly, the gRNA (GGTCCATGTGCTACACACAC) targeting at *YAL061W* with CG as  
600 the PAM was used to repair the mutation in yJL663 with a draft version of *synI*. The donor DNA  
601 was the PCR product from wild-type genomic DNA containing 140bp homology arm on each  
602 side of the target mutation. We got 3 out of 11 positive colonies where the mutation was  
603 repaired.

604

#### 605 **Genomic editing using CRISPR/Cas9 and Cas12a**

606 We also used CRISPR/Cas9 and Cas12a (also called Cpf1) to repair the mapped bugs or  
607 introduce new variants. We followed the protocols as described previously (DiCarlo *et al.*, 2013;  
608 Swiat et al., 2017). All targets, gRNA and PAM sequences for this study are listed in Table S6.

609

#### 610 **Pulsed-field gel electrophoresis (PFGE)**

611 To evaluate the multiple synthetic chromosomes in syn6.5 strains, chromosome plugs were  
612 prepared the separated by clamped homogeneous electric field (CHEF) gel electrophoresis using  
613 the CHEF-DR III Pulsed-Field Electrophoresis System (Bio-Rad), as previously described (Luo  
614 et al., 2018a). The following program was used, temperature: 14 °C, voltage: 6 V/cm, switch  
615 time: 60 s to 120 s, run time: 20 h, included angle: 120°, using 0.5 × Tris-Borate-EDTA buffer  
616 and a 1% gel with low melting point agarose (Bio-Rad #1620137). Gels were stained with 5  
617 µg/ml ethidium bromide in water after electrophoresis for 30 min, de-stained in water for 30 min,  
618 and then imaged.

619

#### 620 **Whole genome sequencing and alignment**

621 The yeast genomic DNA samples for sequencing were prepared using a Norgen Biotek  
622 fungi/yeast genomic DNA isolation kit (Cat No. 27300). The library was prepared using  
623 NEBNext Ultra II FS DNA library prep kit (NEB E7805L) with 500 ng genomic DNA as input.  
624 The whole genome sequencing was performed using an Illumina 4000 system using pair-end  
625 36bp protocol. All raw reads were trimmed to remove adaptor sequence using Trimmomatic, and  
626 subsequently mapped to synthetic chromosome sequences using bowtie2 software. The coverage  
627 for each locus was calculated using BedTools and normalized to average genome-wide coverage.

628

### 629 **GFP tagging and immunoblotting**

630 To quantify protein expression level of *SHM1* by immunoblotting, we first tagged it with GFP.  
631 Since the loxP sites are inserted in 3' UTR close to the stop codon, we integrated the tag at  
632 N-terminal instead of C-terminal. We used the same sequence and design of SWAT library  
633 (Weill et al., 2018). We first isolated the strain of *SHM1* tagged with GFP at N terminal and its  
634 native promoter from the SWAT library. Then, we PCR amplified the region containing GFP and  
635 500bp homology arms on each side from its genomic DNA as the donor DNA, which was  
636 transformed with CRISPR/Cas9, using one gRNA (GACTAGCGATTGTGCACCAC).  
637 Successful integration was confirmed with colony PCR and Sanger sequencing. Notably, the  
638 mitochondria targeting signal of Shm1p was not affected.

639

640 We tagged *SHM1* with GFP in original *synII* (9.03) and fixed *synII* (9.04) strain, generating  
641 YZY516 and YZY517, respectively. The original wild-type strain from SWAT library, YZY208,  
642 was used as a control. These strains were cultured in YPD medium overnight, and then diluted to  
643 produce a log phase culture. The cell lysate was prepared and run on SDS-PAGE as previously  
644 described (Ikushima et al., 2015). Proteins were transferred to a PVDF membrane for blocking,  
645 antibody binding and imaging. Anti-GFP antibody from mouse (Roche 11814460001) at 1:1000  
646 dilution and anti-H3 antibody from rabbit (Abcam ab1791) at 1:2500 dilution were used as the

647 primary antibodies. IRDye Goat anti-mouse IgG (LI-COR Biosciences 926-32210) and Goat  
648 anti-rabbit IgG (LI-COR Biosciences 926-68071) were used as the secondary antibodies,  
649 respectively. The fluorescence signal was detected on an Odyssey CLx Imager from LI-COR.

650  
651 To quantify protein expression level of *SWI3* with loxPsym in 5' UTR and/or 3' UTR at synX,  
652 we first tagged it with 3×Flag tags (DYKDHDGDYKDHDIDYKDDDDK) and a GS linker  
653 (GGGGS)<sub>3</sub> at C-terminus. The immunoblotting was performed with the same method as above.  
654 Anti-Flag antibody from mouse (Sigma F1804) at 1:2000 dilution was used as the primary  
655 antibodies. The same internal control and secondary antibodies were used as above.

656

#### 657 **Real-time PCR**

658 We used real-time PCR to check the expression level of *SHM1* as previously described (Mitchell  
659 *et al.*, 2017). Briefly, from 3 single colonies as triplicates, the RNA was prepared using RNeasy  
660 Mini kit (Qiagen 74106). First strand cDNA was prepared using SuperScript IV Reverse  
661 Transcriptase (Invitrogen 18090050) and oligo d(T)<sub>20</sub> primer. The expression level was tested  
662 using Lightcycler 480 SYBR Green I Master Mix (Lightcycler 04887352001) in a 10 µl reaction  
663 system. The qPCR was performed and analyzed using the LightCycler 480 System. For *SHM1*,  
664 the forward primer (GCTCTGGAAGTGTACGGATTA) and reverse primer  
665 (ACGTTTCATGATAGCGGAGTAAA) were designed by IDT PrimerQuest Tool. The *TAF10*  
666 was used as the internal control (Teste *et al.*, 2009).

667

#### 668 **RNA extraction for transcript profiling**

669 Total RNA was extracted from 50mL flash-frozen cell pellets grown to mid-log (OD<sub>600</sub> ~0.65-  
670 0.85) using MasterPure™ yeast RNA purification kit (Lucigen) including a DNaseI treatment  
671 step. RNA (diluted 1:10) quality and concentration were measured by Agilent 2100 Bioanalyzer

672 with the Agilent RNA 6000 Nano Kit and Qubit™ RNA High Sensitivity Kit (Thermo Fisher),  
673 respectively.

674

### 675 **Direct RNA sequencing**

676 Poly(A) mRNA was enriched from 93.75 µg total RNA on 250 µL Dynabeads oligo(dT)<sub>25</sub> beads.  
677 The direct RNA sequencing kit (SQK-RNA002, Oxford Nanopore Technology) was used to  
678 generate libraries from 500 ng poly(A) RNA. An optional reverse transcription was performed at  
679 50°C for 50 min using SuperScript™ IV reverse transcriptase (Invitrogen) in between the ligation  
680 of the RTA and RMX adaptors. Following reverse transcription the RNA:cDNA was cleaned up  
681 with 1.8 volumes of Agencourt RNAClean XP beads and washed with 70% ethanol. Following  
682 RMX ligation only 1 volume of beads were used in the clean-up, and WSB (SQK-RNA002) was  
683 used in the wash steps. Direct RNA libraries (typically 150-200 ng) were loaded onto primed  
684 (EXP-FLP001) MinION flow cells (FLO-MIN106D, R9 version) in RRB buffer and run on the  
685 GridION with MinKNOW 3.1.8 for up to 72 hours.

686

### 687 **Directional mRNA sequencing**

688 NEBNext® Poly(A) mRNA magnetic isolation module (E7490) was used to enrich poly(A)  
689 mRNA from 500 ng total RNA with 5 µL 1:500 diluted ERCC RNA Spike-In control mix  
690 (Thermo Fisher) in 50 µL. The NEBNext® Ultra™ II directional RNA library prep kit for  
691 Illumina with sample purification beads (E7765) was used to prepare stranded mRNA  
692 sequencing libraries from the poly(A) RNA. Libraries were amplified for 11 cycles with i7 index  
693 primers (E7500S). Libraries were individually cleaned-up with 0.9 volumes of sample  
694 purification beads and concentration and size distributions were measured by Qubit™ dsDNA  
695 high sensitivity kit and by Agilent 2100 Bioanalyzer with the Agilent high sensitivity DNA kit.  
696 Equimolar amounts were combined of all samples, cleaned-up on 0.9 volumes of sample

697 purification beads, and submitted for 150bp paired end sequencing on the NextSeq 500  
698 (Illumina) at the EMBL Genomics Core.

699

### 700 **Base calling, quality-filtering, and long-read alignment**

701 Nanopore long reads were base-called, trimmed of adapter sequences, and filtered for quality,  
702 retaining only those with the best alignment scores for multi-mapping reads, as previously  
703 described (Brooks *et al.*, 2022).

704

### 705 **Gene expression quantification**

706 NEBNext UltraII directional mRNA was quantified at the transcript-level by Salmon v1.6.0  
707 (Patro *et al.*, 2017), aligning to known transcripts as well as those identified in the long-read  
708 sequencing. When observing mature mRNA transcripts, reads were aligned against a database of  
709 transcripts with and without introns. Salmon was run with sequence and position bias modelling  
710 enabled. Differential gene expression analysis was performed in DESeq2 (Love *et al.*, 2014).

711

### 712 **Chromosome swapping to consolidate *synIV***

713 We developed a method to directly consolidate individual new chromosome with other multiple  
714 synthetic chromosomes. In the recipient strain with 6.5 synthetic chromosomes, *can1Δ0*, *lys4Δ0*  
715 with ORF deleted, *cyh2* mutation (Q38K) were introduced using stepwise CRISPR/Cas9 editing  
716 with donor DNA provided. Native *chrIV* was targeted with the *KIURA3-pGAL-CEN4* module.  
717 The *kar1-1* mutation (P150S) was introduced using CRISPR/Cas12a, generating the final  
718 recipient strain YZY402.

719

720 The donor strain (yWZ675, carrying *synIV*, yeast\_chr04\_9\_03) and recipient strain (YZY402,  
721 carrying 6.5 synthetic chromosomes) were prepared as fresh patches (~2 cm in diameter) on  
722 separate YPD plates incubated overnight at 30°C, and then mated together by replica plating.

723 After incubation at 30°C for 12 h, the mating plate was replica-plated to a selection plate of SC–  
724 Lys+Can (60 ng/μl) +cycloheximide (10 ng/μl). After incubation at 30°C for one week, haploid  
725 progeny with both *chrIV* and *synIV* (n+1) were successfully obtained and re-streaked to new  
726 selection plates, which were then checked by PCRtag assays. The efficiency for *synIV* transfer  
727 was around 10% (2 out of 23 screened). Finally, the strain was incubated in YP+galactose  
728 medium to destabilize the native chromosome and selected on 5-FOA plates, generating the final  
729 haploid strain consolidated with new synthetic chromosomes.

730

### 731 **DNA content assay**

732 We used a previously described DNA content assay (Haase and Lew, 1997). Briefly, about  $5 \times$   
733  $10^6$  cells were fixed in ethanol 70% for 1 h at room temperature, then pelleted, washed, and  
734 incubated in 10 mM Tris pH 7.5 with RNase A (0.1 mg/ml, ThermoFisher EN0531) for 2 h at  
735 37°C. Cells were pelleted, resuspended in 10 mM Tris pH7.5 with propidium iodide (5 μg/ml,  
736 Invitrogen P3566), and incubated for 1 h in dark at 4 °C. Finally, the cells were pelleted and  
737 resuspended in 0.5 ml 50 mM Tris pH 7.5, and analyzed using a BD Accuri™ C6 flow  
738 cytometer.

739

### 740 **Scanning electron microscopy**

741 Cultured yeast cells were plated on 12mm poly-l-lysine coated glass coverslip in 24 well dish  
742 and fixed with 2.5% glutaraldehyde in PBS for one hour. After washing with PBS, the yeast cells  
743 were post fixed in 1% Osmium tetroxide for one hour, dehydrated in a series of ethanol solutions  
744 (30%, 50%, 70%, 85%, 95%, 100%), and dried with Tousimis autosamdsri 931 (Rockville, MD)  
745 critical point dryer. The coverslips were put on SEM stabs, sputter coated with gold/palladium by  
746 DESK V TSC HP Denton Vacuum (Moorestown, NJ), and imaged by Zeiss Gemini300 FESEM  
747 (Carl Zeiss Microscopy, Oberkochen, Germany) using secondary electron detector at 3 kv with  
748 working distance 10 mm.

749 **Acknowledgements**

750 We thank M.J. Sadhu, Pan Cheng, Guangbin Shi and Michael Pacold for helpful discussions. We  
751 thank Megan Hogan, Raven Luther, Hannah Ashe and Gwen Ellis from the Matthew Maurano  
752 lab for assistance with WGS. We give special thanks to the Sc2.0 consortium for many  
753 discussions and collaborations. This work is part of Sc2.0 project (<http://syntheticyeast.org/>),  
754 supported by NSF grants MCB-1026068, MCB-1443299, MCB-1616111 and MCB-1921641 to  
755 JDB. Microscopy Laboratory is partially supported by Laura and Isaac Perlmutter Cancer Center  
756 Support Grant NIH/NCI P30CA016087, and Zeiss Gemini300SEM was purchased with NIH S10  
757 OD019974. Transcriptome profiling was funded by a Volkswagen Stiftung grant (94769) to  
758 LMS.

759

760 **Declaration of Interests:**

761 J.D.B is a Founder and Director of CDI Labs, Inc., a Founder of and consultant to  
762 Neochromosome, Inc, a Founder, SAB member of and consultant to ReOpen Diagnostics, LLC  
763 and serves or served on the Scientific Advisory Board of the following: Sangamo, Inc., Modern  
764 Meadow, Inc., Rome Therapeutics, Inc., Sample6, Inc., Tessera Therapeutics, Inc. and the Wyss  
765 Institute. L.A.M. is affiliated with Neochromosome, Inc. The other authors declare no competing  
766 interests.

767

768

769 **References:**

770 **Uncategorized References**

771 Albers, E., Laizé, V., Blomberg, A., Hohmann, S., and Gustafsson, L. (2003). Ser3p (Yer081wp)  
772 and Ser33p (Yil074cp) are phosphoglycerate dehydrogenases in *Saccharomyces cerevisiae*.  
773 *Journal of Biological Chemistry* 278, 10264-10272.  
774 Annaluru, N., Muller, H., Mitchell, L.A., Ramalingam, S., Stracquadanio, G., Richardson, S.M.,  
775 Dymond, J.S., Kuang, Z., Scheifele, L.Z., Cooper, E.M., et al. (2014). Total synthesis of a

776 functional designer eukaryotic chromosome. *Science (New York, N.Y.)* *344*, 55-58.  
777 [10.1126/science.1249252](https://doi.org/10.1126/science.1249252).

778 Auesukaree, C., Damnernsawad, A., Kruatrachue, M., Pokethitiyook, P., Boonchird, C., Kaneko,  
779 Y., and Harashima, S. (2009). Genome-wide identification of genes involved in tolerance to  
780 various environmental stresses in *Saccharomyces cerevisiae*. *Journal of applied genetics* *50*, 301-  
781 310.

782 Beeler, T., Bacikova, D., Gable, K., Hopkins, L., Johnson, C., Slife, H., and Dunn, T. (1998).  
783 The *Saccharomyces cerevisiae* TSC10/YBR265w gene encoding 3-ketosphinganine reductase is  
784 identified in a screen for temperature-sensitive suppressors of the Ca<sup>2+</sup>-sensitive *csg2Δ* mutant.  
785 *Journal of Biological Chemistry* *273*, 30688-30694.

786 Blount, B., Gowers, G.F., Ho, J., Ledesma-Amaro, R., Jovicevic, D., McKiernan, R., Xie, Z., Li,  
787 B., Yuan, Y., and Ellis, T. (2018). Rapid host strain improvement by in vivo rearrangement of a  
788 synthetic yeast chromosome. *Nature communications* *9*, 1-10.

789 Brachmann, C.B., Davies, A., Cost, G.J., Caputo, E., Li, J., Hieter, P., and Boeke, J.D. (1998).  
790 Designer deletion strains derived from *Saccharomyces cerevisiae* S288C: a useful set of strains  
791 and plasmids for PCR-mediated gene disruption and other applications. *Yeast* *14*, 115-132.  
792 [10.1002/\(sici\)1097-0061\(19980130\)14:2<115::aid-yea204>3.0.co;2-2](https://doi.org/10.1002/(sici)1097-0061(19980130)14:2<115::aid-yea204>3.0.co;2-2).

793 Brooks, A.N., Hughes, A.L., Clauder-Münster, S., Mitchell, L.A., Boeke, J.D., and Steinmetz,  
794 L.M. (2022). Transcriptional neighborhoods regulate transcript isoform lengths and expression  
795 levels. *Science (New York, N.Y.)* *375*, 1000-1005.

796 Chen, P.-W., Fonseca, L.L., Hannun, Y.A., and Voit, E.O. (2015). Dynamics of the heat stress  
797 response of ceramides with different fatty-acyl chain lengths in baker's yeast. *PLoS*  
798 *computational biology* *11*, e1004373.

799 Conde, J., and Fink, G.R. (1976). A mutant of *Saccharomyces cerevisiae* defective for nuclear  
800 fusion. *Proceedings of the National Academy of Sciences* *73*, 3651-3655.

801 DiCarlo, J.E., Norville, J.E., Mali, P., Rios, X., Aach, J., and Church, G.M. (2013). Genome  
802 engineering in *Saccharomyces cerevisiae* using CRISPR-Cas systems. *Nucleic Acids Res* *41*,  
803 4336-4343. [10.1093/nar/gkt135](https://doi.org/10.1093/nar/gkt135).

804 Dutcher, S.K. (1981). Internuclear transfer of genetic information in *kar1-1/KAR1* heterokaryons  
805 in *Saccharomyces cerevisiae*. *Molecular and cellular biology* *1*, 245-253.

806 Dymond, J.S., Richardson, S.M., Coombes, C.E., Babatz, T., Muller, H., Annaluru, N., Blake,  
807 W.J., Schwerzmann, J.W., Dai, J., Lindstrom, D.L., et al. (2011). Synthetic chromosome arms  
808 function in yeast and generate phenotypic diversity by design. *Nature* *477*, 471-476.  
809 [10.1038/nature10403](https://doi.org/10.1038/nature10403).

810 Frumkin, I., Lajoie, M.J., Gregg, C.J., Hornung, G., Church, G.M., and Pilpel, Y. (2018). Codon  
811 usage of highly expressed genes affects proteome-wide translation efficiency. *Proceedings of the*  
812 *National Academy of Sciences* *115*, E4940-E4949.



- 813 Garalde, D.R., Snell, E.A., Jachimowicz, D., Sipos, B., Lloyd, J.H., Bruce, M., Pantic, N.,  
814 Admassu, T., James, P., and Warland, A. (2018). Highly parallel direct RNA sequencing on an  
815 array of nanopores. *Nature methods* *15*, 201-206.
- 816 Good, P.D., Kendall, A., Ignatz-Hoover, J., Miller, E.L., Pai, D.A., Rivera, S.R., Carrick, B., and  
817 Engelke, D.R. (2013). Silencing near tRNA genes is nucleosome-mediated and distinct from  
818 boundary element function. *Gene* *526*, 7-15.
- 819 Guimaraes, J.C., Mittal, N., Gnann, A., Jedlinski, D., Riba, A., Buczak, K., Schmidt, A., and  
820 Zavolan, M. (2020). A rare codon-based translational program of cell proliferation. *Genome*  
821 *biology* *21*, 1-20.
- 822 Haase, S.B., and Lew, D.J. (1997). Flow cytometric analysis of DNA content in budding yeast.  
823 *Methods in enzymology* *283*, 322-332.
- 824 Hamdani, O., Dhillon, N., Hsieh, T.-H.S., Fujita, T., Ocampo, J., Kirkland, J.G., Lawrimore, J.,  
825 Kobayashi, T.J., Friedman, B., and Fulton, D. (2019). tRNA genes affect chromosome structure  
826 and function via local effects. *Molecular and cellular biology* *39*, e00432-00418.
- 827 Hill, A., and Bloom, K. (1987). Genetic manipulation of centromere function. *Molecular and*  
828 *Cellular Biology* *7*, 2397-2405. 10.1128/mcb.7.7.2397.
- 829 Hull, M.W., Erickson, J., Johnston, M., and Engelke, D.R. (1994). tRNA genes as transcriptional  
830 repressor elements. *Molecular and cellular biology* *14*, 1266-1277.
- 831 Ikushima, S., Zhao, Y., and Boeke, J.D. (2015). Development of a Tightly Controlled Off Switch  
832 for *Saccharomyces cerevisiae* Regulated by Camphor, a Low-Cost Natural Product. *G3*  
833 (Bethesda) *5*, 1983-1990. 10.1534/g3.114.012765.
- 834 Jacobs, J.Z., Ciccaglione, K.M., Tournier, V., and Zaratiegui, M. (2014). Implementation of the  
835 CRISPR-Cas9 system in fission yeast. *Nat Commun* *5*. 10.1038/ncomms6344.
- 836 Jenkins, G.M., Richards, A., Wahl, T., Mao, C., Obeid, L., and Hannun, Y. (1997). Involvement  
837 of yeast sphingolipids in the heat stress response of *Saccharomyces cerevisiae*. *Journal of*  
838 *Biological Chemistry* *272*, 32566-32572.
- 839 Ji, H., Moore, D., Blomberg, M., Braiterman, L., Voytas, D., Natsoulis, G., and Boeke, J. (1993).  
840 Hotspots for unselected Ty1 transposition events on yeast chromosome III are near tRNA genes  
841 and LTR sequences. *Cell* *73*, 1007-1018.
- 842 Kane, J.F. (1995). Effects of rare codon clusters on high-level expression of heterologous  
843 proteins in *Escherichia coli*. *Current opinion in biotechnology* *6*, 494-500.
- 844 Kastanos, E.K., Woldman, Y.Y., and Appling, D.R. (1997). Role of mitochondrial and  
845 cytoplasmic serine hydroxymethyltransferase isozymes in de novo purine synthesis in  
846 *Saccharomyces cerevisiae*. *Biochemistry* *36*, 14956-14964.
- 847 Lee, J.C.-Y., Tsoi, A., Kornfeld, G.D., and Dawes, I.W. (2013). Cellular responses to L-serine in  
848 *Saccharomyces cerevisiae*: roles of general amino acid control, compartmentalization, and  
849 aspartate synthesis. *FEMS yeast research* *13*, 618-634.

850 Liu, Y. (2020). A code within the genetic code: codon usage regulates co-translational protein  
851 folding. *Cell Communication and Signaling* 18, 1-9.

852 Louvet, O., Roumanie, O., Barthe, C., Peypouquet, M.-F., Schaeffer, J., Doignon, F., and  
853 Crouzet, M. (1999). Characterization of the ORF YBR264c in *Saccharomyces cerevisiae*, which  
854 encodes a new yeast Ypt that is degraded by a proteasome-dependent mechanism. *Molecular and*  
855 *General Genetics MGG* 261, 589-600.

856 Love, M.I., Huber, W., and Anders, S. (2014). Moderated estimation of fold change and  
857 dispersion for RNA-seq data with DESeq2. *Genome biology* 15, 1-21.

858 Luo, J., Sun, X., Cormack, B.P., and Boeke, J.D. (2018a). Karyotype engineering by  
859 chromosome fusion leads to reproductive isolation in yeast. *Nature* 560, 392-396.

860 Luo, Z., Wang, L., Wang, Y., Zhang, W., Guo, Y., Shen, Y., Jiang, L., Wu, Q., Zhang, C., and  
861 Cai, Y. (2018b). Identifying and characterizing SCRaMbLEd synthetic yeast using ReSCuES.  
862 *Nature communications* 9, 1-10.

863 May, A.I., Prescott, M., and Ohsumi, Y. (2020). Autophagy facilitates adaptation of budding  
864 yeast to respiratory growth by recycling serine for one-carbon metabolism. *Nature*  
865 *communications* 11, 1-14.

866 Melcher, K., and Entian, K.-D. (1992). Genetic analysis of serine biosynthesis and glucose  
867 repression in yeast. *Current genetics* 21, 295-300.

868 Mercy, G., Mozziconacci, J., Scolari, V.F., Yang, K., Zhao, G., Thierry, A., Luo, Y., Mitchell,  
869 L.A., Shen, M., and Shen, Y. (2017). 3D organization of synthetic and scrambled chromosomes.  
870 *Science (New York, N.Y.)* 355.

871 Mitchell, L.A., Wang, A., Stracquadanio, G., Kuang, Z., Wang, X., Yang, K., Richardson, S.,  
872 Martin, J.A., Zhao, Y., Walker, R., et al. (2017). Synthesis, debugging, and effects of synthetic  
873 chromosome consolidation: synVI and beyond. *Science (New York, N.Y.)* 355.  
874 [10.1126/science.aaf4831](https://doi.org/10.1126/science.aaf4831).

875 Morgan, J.T., Fink, G.R., and Bartel, D.P. (2019). Excised linear introns regulate growth in  
876 yeast. *Nature* 565, 606-611.

877 Nishimasu, H., Shi, X., Ishiguro, S., Gao, L., Hirano, S., Okazaki, S., Noda, T., Abudayyeh,  
878 O.O., Gootenberg, J.S., and Mori, H. (2018). Engineered CRISPR-Cas9 nuclease with expanded  
879 targeting space. *Science (New York, N.Y.)* 361, 1259-1262.

880 Parenteau, J., Maignon, L., Berthoumieux, M., Catala, M., Gagnon, V., and Abou Elela, S.  
881 (2019). Introns are mediators of cell response to starvation. *Nature* 565, 612-617.

882 Patro, R., Duggal, G., Love, M.I., Irizarry, R.A., and Kingsford, C. (2017). Salmon provides fast  
883 and bias-aware quantification of transcript expression. *Nature methods* 14, 417-419.

884 Peterson, C.L., and Herskowitz, I. (1992). Characterization of the yeast SWI1, SWI2, and SWI3  
885 genes, which encode a global activator of transcription. *Cell* 68, 573-583.

- 886 Piper, M.D., Hong, S.-P., Ball, G.E., and Dawes, I.W. (2000). Regulation of the Balance of One-  
887 carbon Metabolism in *Saccharomyces cerevisiae*. *Journal of Biological Chemistry* 275, 30987-  
888 30995.
- 889 Reid, R.J.D., Sunjevaric, I., Voth, W.P., Ciccone, S., Du, W., Olsen, A.E., Stillman, D.J., and  
890 Rothstein, R. (2008). Chromosome-Scale Genetic Mapping Using a Set of 16 Conditionally  
891 Stable *Saccharomyces cerevisiae* Chromosomes. *Genetics* 180, 1799-1808.  
892 10.1534/genetics.108.087999.
- 893 Richardson, S.M., Mitchell, L.A., Stracquadiano, G., Yang, K., Dymond, J.S., DiCarlo, J.E., Lee,  
894 D., Huang, C.L., Chandrasegaran, S., Cai, Y., et al. (2017). Design of a synthetic yeast genome.  
895 *Science (New York, N.Y.)* 355, 1040-1044. 10.1126/science.aaf4557.
- 896 Sadhu, M.J., Bloom, J.S., Day, L., and Kruglyak, L. (2016). CRISPR-directed mitotic  
897 recombination enables genetic mapping without crosses. *Science (New York, N.Y.)* 352, 1113-  
898 1116. 10.1126/science.aaf5124.
- 899 Shen, M.J., Wu, Y., Yang, K., Li, Y., Xu, H., Zhang, H., Li, B.Z., Li, X., Xiao, W.H., Zhou, X.,  
900 et al. (2018). Heterozygous diploid and interspecies SCRaMbLEing. *Nat Commun* 9, 1934.  
901 10.1038/s41467-018-04157-0.
- 902 Shen, Y., Stracquadiano, G., Wang, Y., Yang, K., Mitchell, L.A., Xue, Y., Cai, Y., Chen, T.,  
903 Dymond, J.S., Kang, K., et al. (2016). SCRaMbLE generates designed combinatorial stochastic  
904 diversity in synthetic chromosomes. *Genome Res* 26, 36-49. 10.1101/gr.193433.115.
- 905 Shen, Y., Wang, Y., Chen, T., Gao, F., Gong, J., Abramczyk, D., Walker, R., Zhao, H., Chen, S.,  
906 Liu, W., et al. (2017). Deep functional analysis of *synII*, a 770-kilobase synthetic yeast  
907 chromosome. *Science (New York, N.Y.)* 355. 10.1126/science.aaf4791.
- 908 Swiat, M.A., Dashko, S., den Ridder, M., Wijsman, M., van der Oost, J., Daran, J.M., and Daran-  
909 Lapujade, P. (2017). Fncpf1: a novel and efficient genome editing tool for *Saccharomyces*  
910 *cerevisiae*. *Nucleic Acids Res* 45, 12585-12598. 10.1093/nar/gkx1007.
- 911 Taddei, A., and Gasser, S.M. (2012). Structure and function in the budding yeast nucleus.  
912 *Genetics* 192, 107-129.
- 913 Teste, M.-A., Duquenne, M., François, J.M., and Parrou, J.-L. (2009). Validation of reference  
914 genes for quantitative expression analysis by real-time RT-PCR in *Saccharomyces cerevisiae*.  
915 *BMC molecular biology* 10, 1-15.
- 916 Torrent, M., Chalancon, G., de Groot, N.S., Wuster, A., and Madan Babu, M. (2018). Cells alter  
917 their tRNA abundance to selectively regulate protein synthesis during stress conditions. *Science*  
918 *signaling* 11, eaat6409.
- 919 Villa-García, M.J., Choi, M.S., Hinz, F.I., Gaspar, M.L., Jesch, S.A., and Henry, S.A. (2011).  
920 Genome-wide screen for inositol auxotrophy in *Saccharomyces cerevisiae* implicates lipid  
921 metabolism in stress response signaling. *Molecular genetics and genomics* 285, 125-149.

922 Wang, Y., Li, C., Khan, M.R.I., Wang, Y., Ruan, Y., Zhao, B., Zhang, B., Ma, X., Zhang, K.,  
923 and Zhao, X. (2016). An engineered rare codon device for optimization of metabolic pathways.  
924 *Scientific reports* 6, 1-11.

925 Wei, Y., Silke, J.R., and Xia, X. (2019). An improved estimation of tRNA expression to better  
926 elucidate the coevolution between tRNA abundance and codon usage in bacteria. *Scientific*  
927 *reports* 9, 1-11.

928 Weill, U., Yofe, I., Sass, E., Stynen, B., Davidi, D., Natarajan, J., Ben-Menachem, R., Avihou,  
929 Z., Goldman, O., and Harpaz, N. (2018). Genome-wide SWAp-Tag yeast libraries for proteome  
930 exploration. *Nature methods* 15, 617-622.

931 Wu, Y., Li, B.Z., Zhao, M., Mitchell, L.A., Xie, Z.X., Lin, Q.H., Wang, X., Xiao, W.H., Wang,  
932 Y., Zhou, X., et al. (2017). Bug mapping and fitness testing of chemically synthesized  
933 chromosome X. *Science (New York, N.Y.)* 355. 10.1126/science.aaf4706.

934 Xie, Z.-X., Li, B.-Z., Mitchell, L.A., Wu, Y., Qi, X., Jin, Z., Jia, B., Wang, X., Zeng, B.-X., and  
935 Liu, H.-M. (2017). “Perfect” designer chromosome V and behavior of a ring derivative. *Science*  
936 (New York, N.Y.) 355, eaaf4704.

937 Xie, Z.X., Mitchell, L.A., Liu, H.M., Li, B.Z., Liu, D., Agmon, N., Wu, Y., Li, X., Zhou, X., Li,  
938 B., et al. (2018). Rapid and Efficient CRISPR/Cas9-Based Mating-Type Switching of  
939 *Saccharomyces cerevisiae*. *G3 (Bethesda)* 8, 173-183. 10.1534/g3.117.300347.

940 Yoshinaga, S.K., Peterson, C.L., Herskowitz, I., and Yamamoto, K.R. (1992). Roles of SWI1,  
941 SWI2, and SWI3 proteins for transcriptional enhancement by steroid receptors. *Science (New*  
942 *York, N.Y.)* 258, 1598-1604.

943 Zetsche, B., Gootenberg, J.S., Abudayyeh, O.O., Slaymaker, I.M., Makarova, K.S.,  
944 Essletzbichler, P., Volz, S.E., Joung, J., van der Oost, J., Regev, A., et al. (2015). Cpf1 is a single  
945 RNA-guided endonuclease of a class 2 CRISPR-Cas system. *Cell* 163, 759-771.  
946 10.1016/j.cell.2015.09.038.

947 Zhang, W., Zhao, G., Luo, Z., Lin, Y., Wang, L., Guo, Y., Wang, A., Jiang, S., Jiang, Q., Gong,  
948 J., et al. (2017). Engineering the ribosomal DNA in a megabase synthetic chromosome. *Science*  
949 (New York, N.Y.) 355. 10.1126/science.aaf3981.

950 Zhao, M., Zhao, Y., Yao, M., Iqbal, H., Hu, Q., Liu, H., Qiao, B., Li, C., Skovbjerg, C.A., and  
951 Nielsen, J.C. (2020). Pathway engineering in yeast for synthesizing the complex polyketide  
952 bikaverin. *Nature communications* 11, 1-10.

953 Zhao, Y., and Boeke, J.D. (2018). Construction of Designer Selectable Marker Deletions with a  
954 CRISPR-Cas9 Toolbox in *Schizosaccharomyces pombe* and New Design of Common Entry  
955 Vectors. *G3 (Bethesda)* 8, 789-796. 10.1534/g3.117.300363.

956 Zhao, Y., and Boeke, J.D. (2020). CRISPR–Cas12a system in fission yeast for multiplex  
957 genomic editing and CRISPR interference. *Nucleic acids research* 48, 5788-5798.

958

959

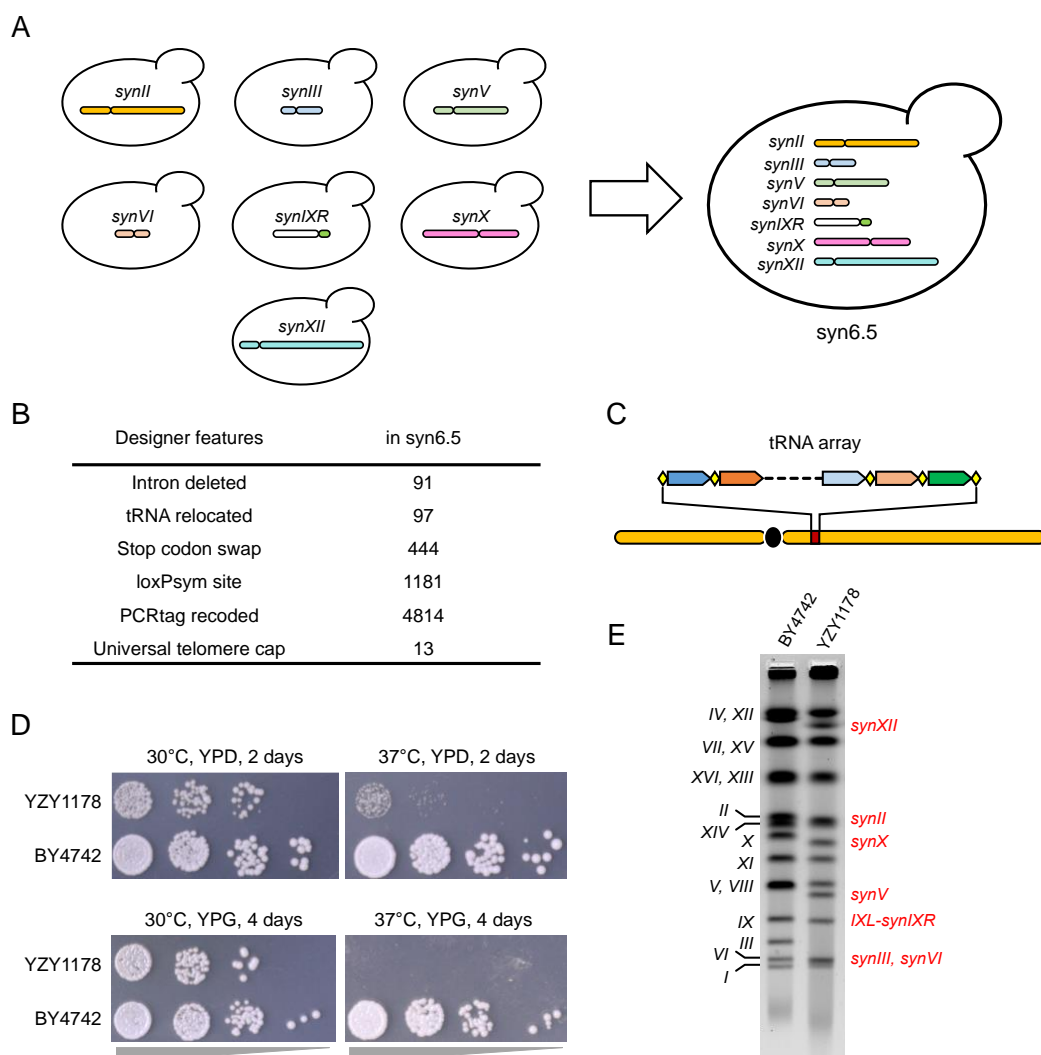

960

961 **Figure 1. Consolidation of multiple synthetic chromosomes.**

962 (A) All previously assembled synthetic chromosomes, *synII*, *synIII*, *synV*, *synVI*, *synIXR*, *synX* and *synXII* were  
 963 consolidated using endoreduplication intercross, generating one haploid strain, syn6.5. (B) Sc2.0 designer features  
 964 carried in the syn6.5 strain. (C) A tRNA array was integrated into each synthetic chromosome to maintain the tRNA  
 965 abundance and balance. Each tRNA gene was flanked with rox recombination sites (yellow diamond). The detailed  
 966 anatomy of these arrays is shown in Figures S3 and S4. (D) Fitness assays for draft syn6.5 strain, YZY1178, after  
 967 consolidation was completed. (E) Pulsed field gel (PFGE) to evaluate the electrophoretic karyotype of a syn6.5  
 968 strain.

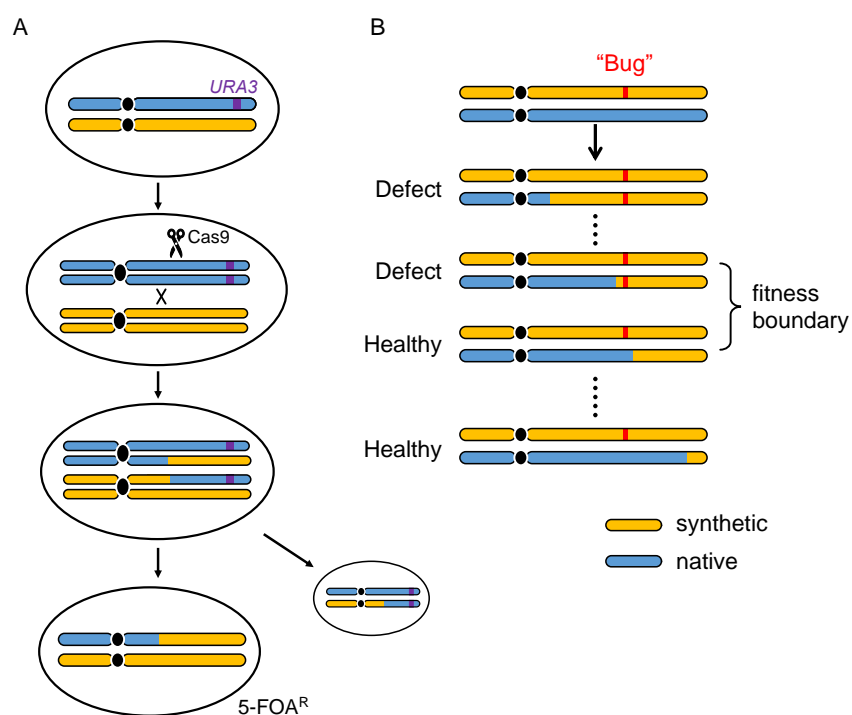

969

970 **Figure 2. Fitness mapping using CRISPR D-BUGS.**

971 (A) General outline. A *URA3* marker is integrated into the native allele (blue), which is cleaved by Cas9 targeted by  
972 an sgRNA selected specifically to cut at one WT PCRtag. Following mitotic recombination, strains homozygous for  
973 the synthetic region (orange) are selected on 5-FOA plate. (B) A series of these strains with different synthetic  
974 region are generated by gRNAs targeting different WT PCRtag loci to map the fitness boundary.

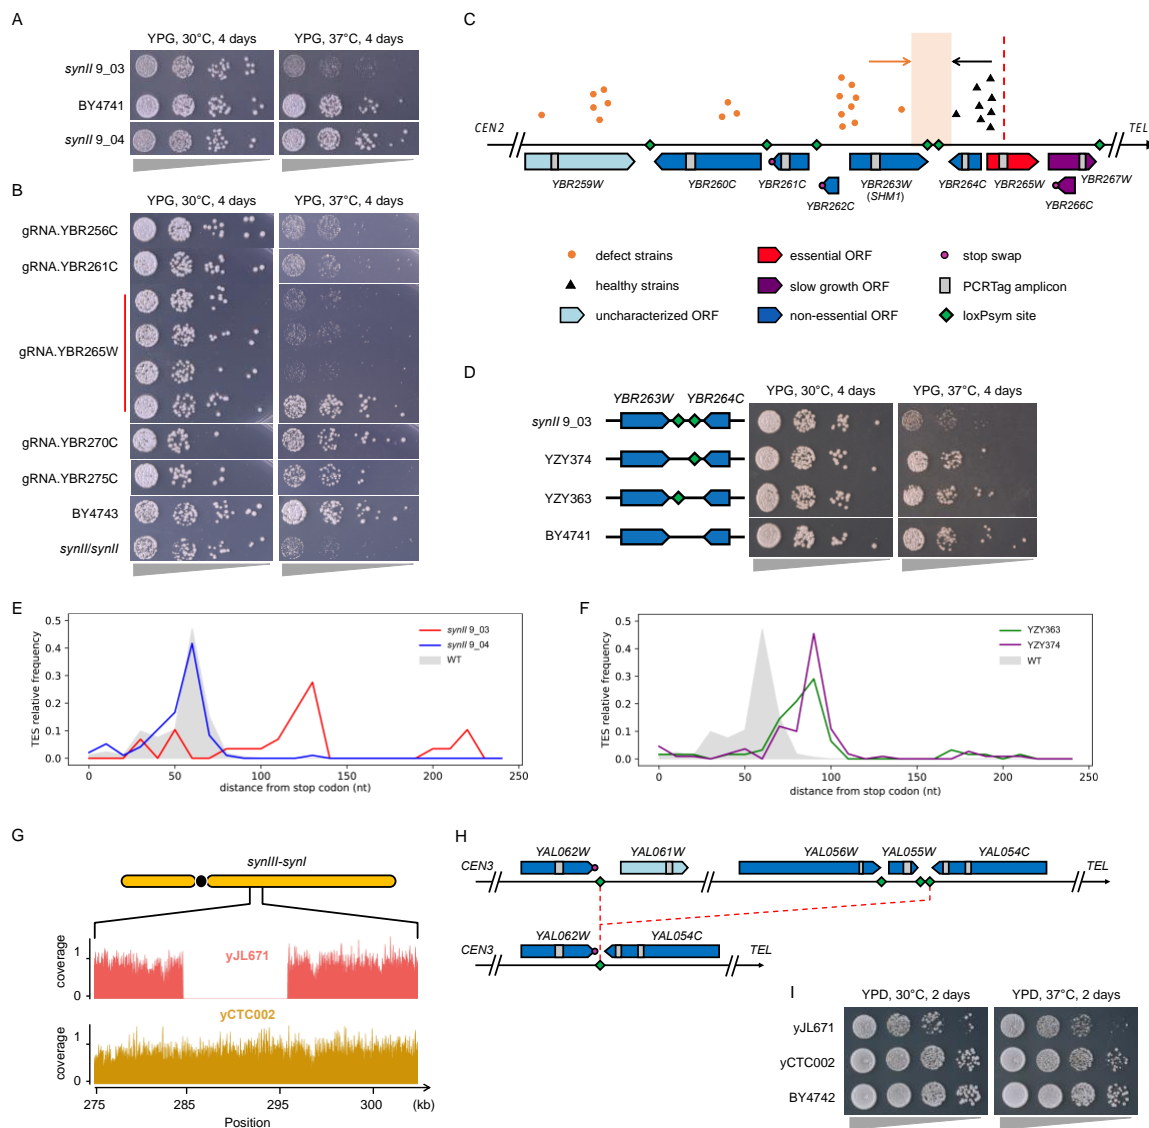

975

976 **Figure 3. CRISPR-D-BUGS mapping in *synII* and *synIII-synI* fusion chromosomes.**

977 (A) Fitness assay on YPG plates for a strain with the original *synII* (9\_03), compared to wild type control (BY4741).

978 In strain ZYZ166 (9\_04), the bug was fixed by deleting the two loxPsym sites downstream of *SHM1*. (B) The  
979 CRISPR-D-BUGS colonies generated using gRNAs labeled on the left side. For each gRNA, at least four colonies  
980 were tested and showed the same fitness except gRNA.YBR265W. More colonies are shown in Figure S7. (C) The

981 recombination sites in gRNA.YBR265W colonies indicating their fitness level are aligned with *synII* designer  
982 features. Red dashed line indicates the locus in *synII* corresponding to the cleavage site in the native counterpart.  
983 The original fitness assay for these strains is shown in Figure S8. (D) Fitness assay for the strains with the deletion

984 of both or either loxPsym sites(s). (E) Transcript end site (TES) distributions of *SHM1* transcripts from original

985 *synII* (red) and updated *synII* (blue), compared to wild type (gray). (F) The same measurements in strains with either

986 loxPsym site deleted (YZY363 and YZY374 as in panel D) are also shown. (G) Deletion detected in *synIII-synI*  
 987 strain (yJL671), which was repaired in the final version (yCTC002). (H) The diagram of *synI* in design (upper) and  
 988 actual strain of yJL671 (bottom). (I) Fitness assay for final *synI* strain (yCTC002) after bug was repaired.

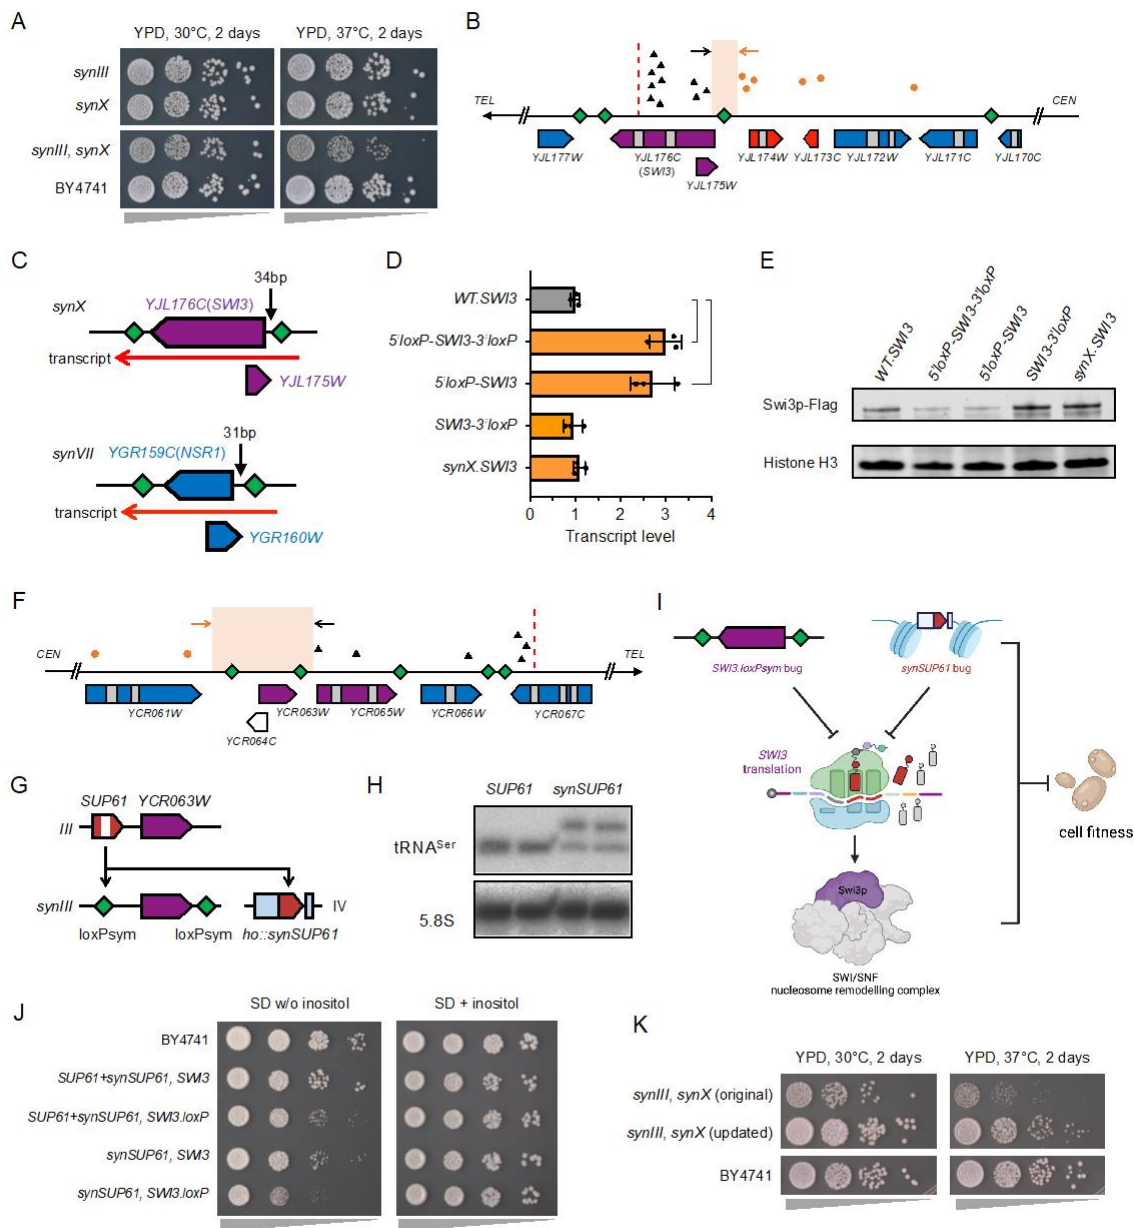

989  
 990 **Figure 4. Combinatorial defect between *synIII* and *synX*.**

991 (A) Fitness assay showing a combinatorial defect in *synIII, synX* context. (B) For *synX* bug mapping, single colonies  
 992 generated using gRNA. YJL176C showed mixed fitness; recombination intervals were aligned to *synX* left arm.



993 Same labels as in Figure 3C were used here. Fitness assays for these colonies are shown in Figure S18. (C) Diagram  
994 of *YJL176C* (*SWI3*) loxPsym pattern, compared to *YGR159C* (*NSR1*) from *synVII* (Shen et al., 2022). (D) *SWI3*  
995 transcript levels in wild type background (gray bar), and *synX* strains (orange bars) with both loxPsym sites (*5'loxP-*  
996 *SWI3-3'loxP*), 3' loxPsym deleted (*5'loxP-SWI3*), 5' loxPsym deleted (*SWI3-3'loxP*) and no loxPsym site  
997 (*synX.SWI3*). (E) Immunoblotting of Swi3p-Flag in strains with the loxPsym deleted from 5' and/or 3' UTR. (F) For  
998 *synIII* bug mapping, recombination intervals of single colonies generated from gRNA.YCR067C were aligned to  
999 *synIII* right arm. Fitness assays for these colonies are shown in Figure S20. (G) Relocation of *synSUP61* to the *HO*  
1000 locus. Gray blocks indicate flanking sequences from *Ashbya gossypii*. White band indicates the *SUP61* intron that is  
1001 removed in the synthetic version. (H) Northern blot to check the quality and level of tRNA<sup>Ser</sup> expressed from native  
1002 and synthetic *SUP61*. (I) Proposed combinatorial interactions between *synSUP61* bug and *SWI3.loxP* bug. (J)  
1003 Inositol auxotrophy analysis, with wild type *SUP61* integrated and/or *SWI3* bug repaired. (K) Fitness assay of final  
1004 *synIII*, *synX* strain with both bugs fixed.

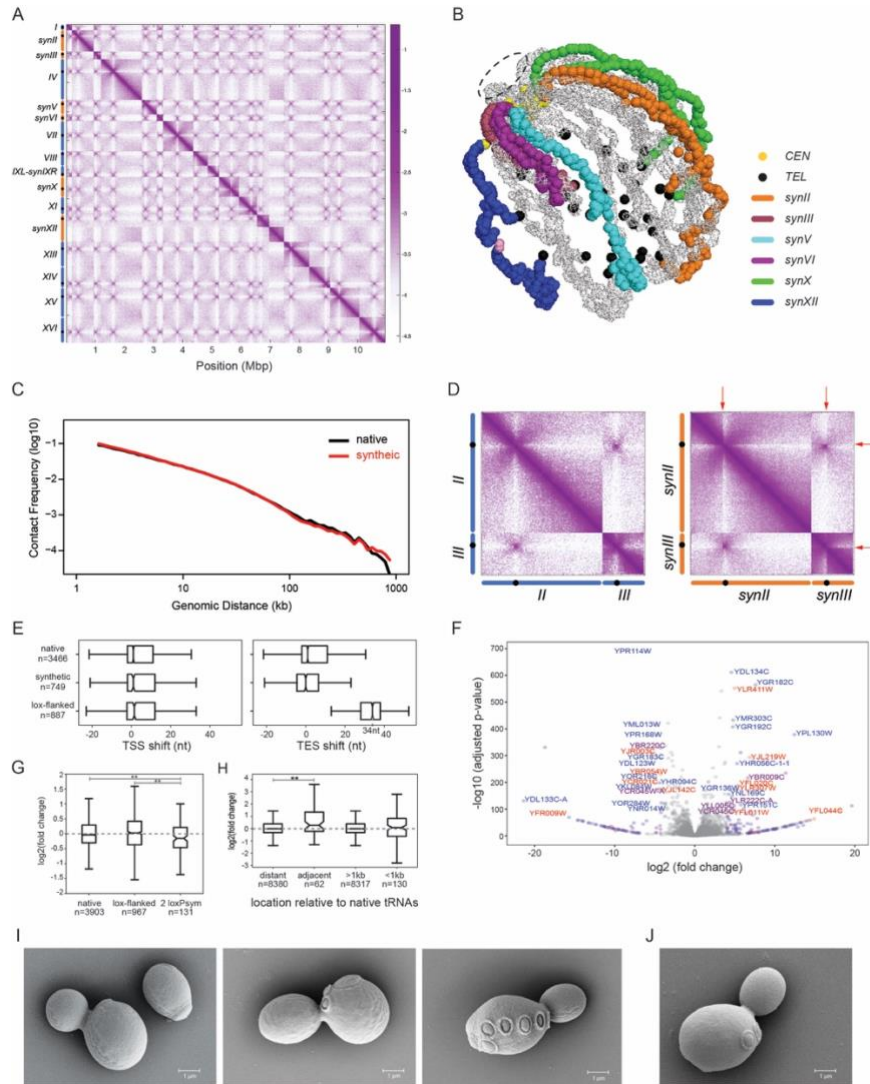

1005  
1006

1007 **Figure 5. Characterization of the strain with multiple synthetic chromosomes.**

1008 (A) The heat map shows the contact probability ( $\log_{10}$ ) between pairs of chromosomal sites. The genome position  
 1009 (kb) and corresponding chromosomes were labeled as horizontal and vertical axes, respectively. (B) The 3D  
 1010 chromosome trajectories of multiple synthetic chromosomes. Gray, all other native chromosomes. The 3D structures  
 1011 are shown in Supplementary Data-1 and as a movie in Supplementary Data-2. (C) Contact frequencies as a function  
 1012 of the genomic distance. (D) Heat maps for native (left) and synthetic (right) chromosomes *II* and *III*. The sharp  
 1013 boundaries at the rDNA array integration loci are highlighted with red arrows. (E) Change in distribution of  
 1014 transcript start sites (TSSs) and transcript end sites (TESs) in transcript isoforms arising from the native and  
 1015 synthetic chromosomes in the *syn6.5* strain compared to wild type. Lox-flanked genes indicate the genes on  
 1016 synthetic chromosomes with 3' loxPsym sites. (F) Volcano plot of gene expression in the multiple synthetic  
 1017 chromosome strain, compared to wild type. Lists of significantly up- and down-regulated genes are presented in  
 1018 Tables S7 and S8. Blue, genes in native chromosomes. Purple, genes in synthetic chromosomes. Red, genes with

1019 loxPsym site incorporated. (G) Change in expression level of genes that give rise to transcripts with two loxPsym  
1020 sites in their 3' UTRs compared to genes on native and synthetic chromosomes in the syn6.5 strain. (H) Comparison  
1021 of expression level changes in the synthetic strain, in which tRNAs are relocated, for the genes closest to native  
1022 tRNAs (adjacent) and all other genes (distant), as well as genes either <1kb or >1kb away from native tRNAs. The  
1023 adjacent genes are listed in Table S9. Mann Whitney U tests were used to determine significant difference between  
1024 gene sets, \*\*p<0.01. (I) SEM pictures of single yeast cells with multiple synthetic chromosomes, compared to wild-  
1025 type cells as in (J).

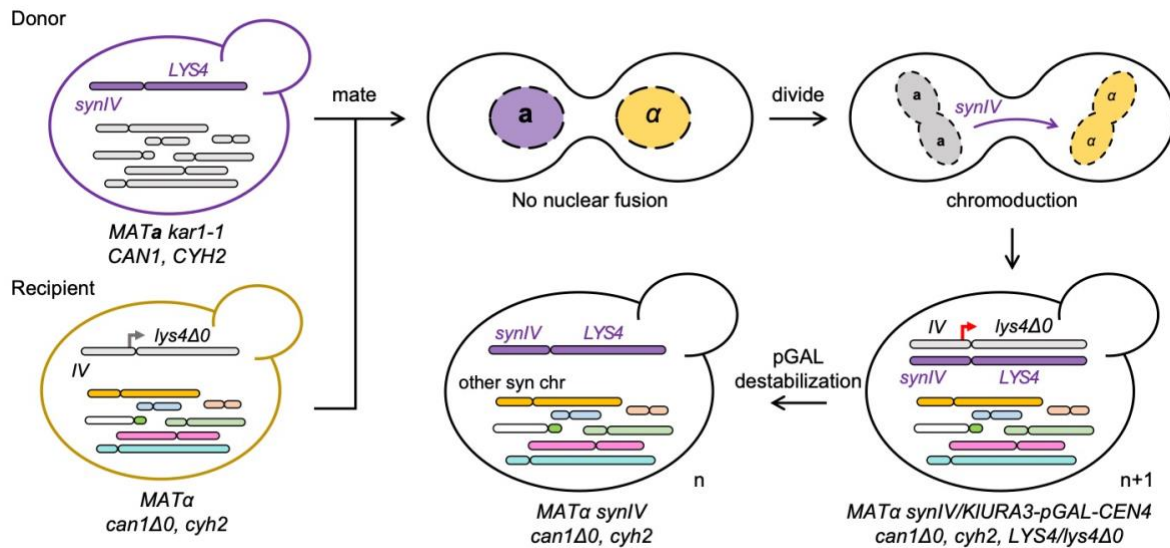

1026

1027

**Figure 6. Consolidation of *synIV* into *syn6.5* strains using chromosome swap.**

1028

Donor: a strain carrying a synthetic chromosome(s) to be introduced with a selectable marker (*synIV* and *LYS4* in

1029

this example). Recipient: the strain of the opposite mating type already containing one or more multiple synthetic

1030

chromosomes, but retaining the native counterpart of the target (native *chrIV* and *lys4* $\Delta$ 0 here), which is tagged with

1031

*KIURA3* and pGAL-CEN (black hooked arrow). After cell conjugation, nuclear fusion is blocked by the *kar1-1*

1032

mutation. Transfer of *synIV* by chromoduction into recipient haploid progeny can be selected using the appropriate

1033

auxotrophic and drug-resistance markers. Finally, native *chrIV* is destabilized by induction of the pGAL promoter

1034

(red hooked arrow), which can be selected as 5-FOA<sup>R</sup> due to the loss of *KIURA3*, completing the process of

1035

chromosome swapping.
